# Supplementary material for: A reversible two-electron redox system involving a divalent lead species
Source: Royal Society of Chemistry journal article supplement (doi:10.1039/c4cc09856k), 2015-01-01

## Supporting Information for the Communication Entitled "A reversible two-electron redox system involving a divalent lead species"

Masaichi Saito,<sup>a,\*</sup> Marisa Nakada,<sup>a</sup> Takuya Kuwabara<sup>a</sup> and Mao Minoura<sup>b</sup>

<sup>a</sup>*Department of Chemistry, Graduate School of Science and Engineering, Saitama University, Shimo-okubo, Sakura-ku, Saitama-city, Saitama, 338-8570, Japan.*

*E-mail: masaichi@chem.saitama-u.ac.jp*

<sup>b</sup>*Department of Chemistry, Graduate School of Science, Rikkyo University, Nishi-ikebukuro, Toshima-ku, Tokyo, 171-0021, Japan.*

### Contents

1. Experimental procedure
2. NMR charts for compound **3**
3. NMR charts for compound **4**
4. Monitoring the reaction of **3** with FcBF<sub>4</sub> by NMR spectroscopy
5. Monitoring the reaction of **3** with B(C<sub>6</sub>F<sub>5</sub>)<sub>3</sub> by NMR spectroscopy
6. Monitoring the reaction of **3** with 1,2-dibromoethane (1 equiv.) by NMR spectroscopy
7. NMR charts for compound **1** in toluene-*d*<sub>8</sub> for the reference

**General procedure.** All experiments were performed under argon atmosphere in a glovebox or using standard Schlenk techniques. THF, toluene, hexane and pentane for reactions and benzene-*d*<sub>6</sub>, THF-*d*<sub>8</sub> and toluene-*d*<sub>8</sub> for NMR measurement were purified potassium mirror before used. <sup>1</sup>H NMR (500 MHz), <sup>13</sup>C NMR (101 MHz), <sup>7</sup>Li NMR (194 MHz) and <sup>207</sup>Pb NMR (105 MHz) were recorded on a Bruker DPX-400 Cryo, an AVANCE-500 or an AVANCE-500T.

**Preparation of THF-stabilized plumbacyclopentadienylidene.** A THF (3 mL) solution of 1,4-dilithio-1,3-butadiene **2**<sup>S1</sup> (138 mg including two diethyl ether molecules, 0.23 mmol) was added to a THF (3 mL) suspension of lead dichloride (70 mg, 0.25 mmol) and the resulting mixture was stirred at room temperature for 1.5 h. After evaporation of the solvent, an inorganic salt insoluble in pentane was removed by filtration followed by recrystallization from pentane to afford THF-stabilized plumbacyclopentadienylidene **1** (134 mg, 0.17 mmol, 74%).<sup>S2</sup>

**Reduction of THF-stabilized plumbacyclopentadienylidene by lithium.** Toluene (1.3 mL) was added to a mixture of plumbacyclopentadienylidene coordinated by two THF molecules **1** (172 mg, 0.22 mmol) and lithium (15 mg, 2.2 mmol) at room temperature, and the mixture was stirred for 9

hours. After removal of remaining lithium, the filtrate was concentrated and recrystallized from hexane and toluene (5 : 1) to afford dilithioplumbole **3** (127 mg including two THF molecules, 0.16 mmol, 73%) as green crystals. **3**: Mp: 190 °C (dec.). <sup>1</sup>H NMR (500 MHz, C<sub>6</sub>D<sub>6</sub>): δ 0.30 (s, 12H, SiMe<sub>2</sub><sup>*t*</sup>Bu), 1.09–1.11 (m, 8H, *thf*), 1.23 (s, 18H, SiMe<sub>2</sub><sup>*t*</sup>Bu), 3.34–3.36 (m, 8H, *thf*), 6.95–6.98 (m, 2H, *Ph*), 7.03–7.05 (m, 4H, *Ph*), 7.09–7.12 (m, 4H, *Ph*); <sup>13</sup>C NMR (101 MHz, C<sub>6</sub>D<sub>6</sub>): δ 3.56 (1°, SiMe<sub>2</sub><sup>*t*</sup>Bu, *J*<sub>Pb-C</sub> = 33 Hz), 17.04 (4°, SiMe<sub>2</sub><sup>*t*</sup>Bu), 25.15 (2°, *thf*), 29.33 (1°, SiMe<sub>2</sub><sup>*t*</sup>Bu, *J*<sub>Pb-C</sub> = 21 Hz), 69.81 (2°, *thf*), 124.86 (3°, *Ph*), 126.75 (3°, *Ph*), 132.09 (3°, *Ph*), 158.71 (4°, *C*<sub>ipso</sub>, *J*<sub>Pb-C</sub> = 40 Hz), 159.38 (4°, *C*<sub>β</sub>, *J*<sub>Pb-C</sub> = 57 Hz), 213.47 (4°, *C*<sub>α</sub>, *J*<sub>Pb-C</sub> = 860 Hz); <sup>7</sup>Li NMR (194 MHz, C<sub>6</sub>D<sub>6</sub>): δ -3.5; <sup>7</sup>Li NMR (194 MHz, THF-C<sub>6</sub>D<sub>6</sub>): δ -2.3; <sup>7</sup>Li NMR (194 MHz, THF-*d*<sub>8</sub>, 203 K): δ -5.0, -2.2; <sup>29</sup>Si NMR (99 MHz, C<sub>6</sub>D<sub>6</sub>): δ 5.6; <sup>207</sup>Pb NMR (105 MHz, C<sub>6</sub>D<sub>6</sub>): δ 2572.5. As the compound is highly sensitive to air and moisture, results for its elemental analysis were not reproducible or sufficient.

**Oxidation of dilithioplumbole 3 by ferrocenium tetrafluoroborate.** THF (3 mL) was added to a mixture of dilithioplumbole **3** (19 mg including two THF molecules, 0.024 mmol) and ferrocenium tetrafluoroborate (13 mg, 0.048 mmol) at room temperature. After stirring for a few minutes, the <sup>1</sup>H and <sup>13</sup>C NMR spectra of the reaction mixture revealed the quantitative formation of THF-stabilized plumbacyclopentadienyliene **1**.

**Oxidation of dilithioplumbole 3 by tris(pentafluorophenyl)borane.** Benzene-*d*<sub>6</sub> (0.5 mL) was added to a mixture of dilithioplumbole **3** (25 mg including two THF molecules, 0.031 mmol) and tris(pentafluorophenyl)borane (31 mg, 0.061 mmol) at room temperature. After addition of a few drops of THF, the <sup>1</sup>H and <sup>13</sup>C NMR spectra of the reaction mixture revealed the quantitative formation of THF-stabilized plumbacyclopentadienyliene **1**.

**Reaction of dilithioplumbole 3 with 1,2-dibromoethane.** A toluene solution of 1,2-dibromoethane (0.39 mol/L; 0.1 mL, 0.04 mmol) was added to a toluene (1 mL) solution of dilithioplumbole **3** (67 mg including two THF molecules, 0.084 mmol) at room temperature. After evaporation of volatile substances, an inorganic salt insoluble in hexane was removed by filtration. Concentration of the filtrate followed by recrystallization of the residue from THF and hexane (1 : 10) afforded 1,1'-dilithiobioplumbole **4** (48 mg including two THF and a hexane molecules, 0.031 mmol, 74%) as red crystals. **4**: Mp: 90 °C (dec.). <sup>7</sup>Li NMR (194 MHz, THF-C<sub>6</sub>D<sub>6</sub>): δ -0.3; <sup>29</sup>Si NMR (99 MHz, THF-C<sub>6</sub>D<sub>6</sub>): δ 4.0; <sup>207</sup>Pb NMR (105 MHz, THF-C<sub>6</sub>D<sub>6</sub>): δ 1390.6. The <sup>1</sup>H NMR signals are all broadening and therefore cannot be properly assigned, see the NMR chart shown below. Measurement of the <sup>13</sup>C NMR spectrum was not successful because the compound decomposed during the overnight accumulation. As the compound is highly sensitive to air and moisture, results for its elemental analysis were not reproducible or sufficient.



## References

- (S1) (a) M. Saito, M. Nakamura, T. Tajima and M. Yoshioka, *Angew. Chem., Int. Ed.*, 2007, **46**, 1504;  
(b) T. Kuwabara, J.-D. Guo, S. Nagase, M. Minoura, R. H. Herber and M. Saito, *Organometallics*, 2014, **33**, 2910.
- (S2) M. Saito, T. Akiba, M. Kaneko, T. Kawamura, M. Abe, M. Hada and M. Minoura, *Chem. Eur. J.*, 2013, **19**, 16946.

TBDMS Ph dilithioplumbole 1H in C6D6

7.1201  
7.1052  
7.0905  
7.0473  
7.0321  
6.9777  
6.9632  
6.9487

3.3627  
3.3502  
3.3380

1.2261  
1.1144  
1.1017  
1.0958  
1.0892

0.2953

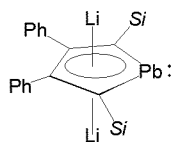

3

Si = Si<sup>t</sup>BuMe<sub>2</sub>

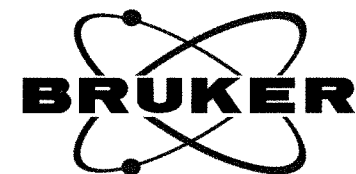

NAME A13MC116BT  
EXPNO 1  
PROCNO 1  
Date\_ 20130517  
Time\_ 14.50  
INSTRUM spect  
PROBHD 5 mm PABBO BB-  
PULPROG zg30  
TD 65536  
SOLVENT C6D6  
NS 8  
DS 2  
SWH 10330.578 Hz  
FIDRES 0.157632 Hz  
AQ 3.1719923 sec  
RG 40.3  
DW 48.400 usec  
DE 6.50 usec  
TE 300.2 K  
D1 1.00000000 sec  
TD0 1

===== CHANNEL f1 =====  
NUC1 1H  
P1 12.00 usec  
PL1 2.60 dB  
PL1W 15.32226563 W  
SFO1 500.1330885 MHz  
SI 32768  
SF 500.1300015 MHz  
WDW EM  
SSB 0  
LB 0.30 Hz  
GB 0  
PC 1.00

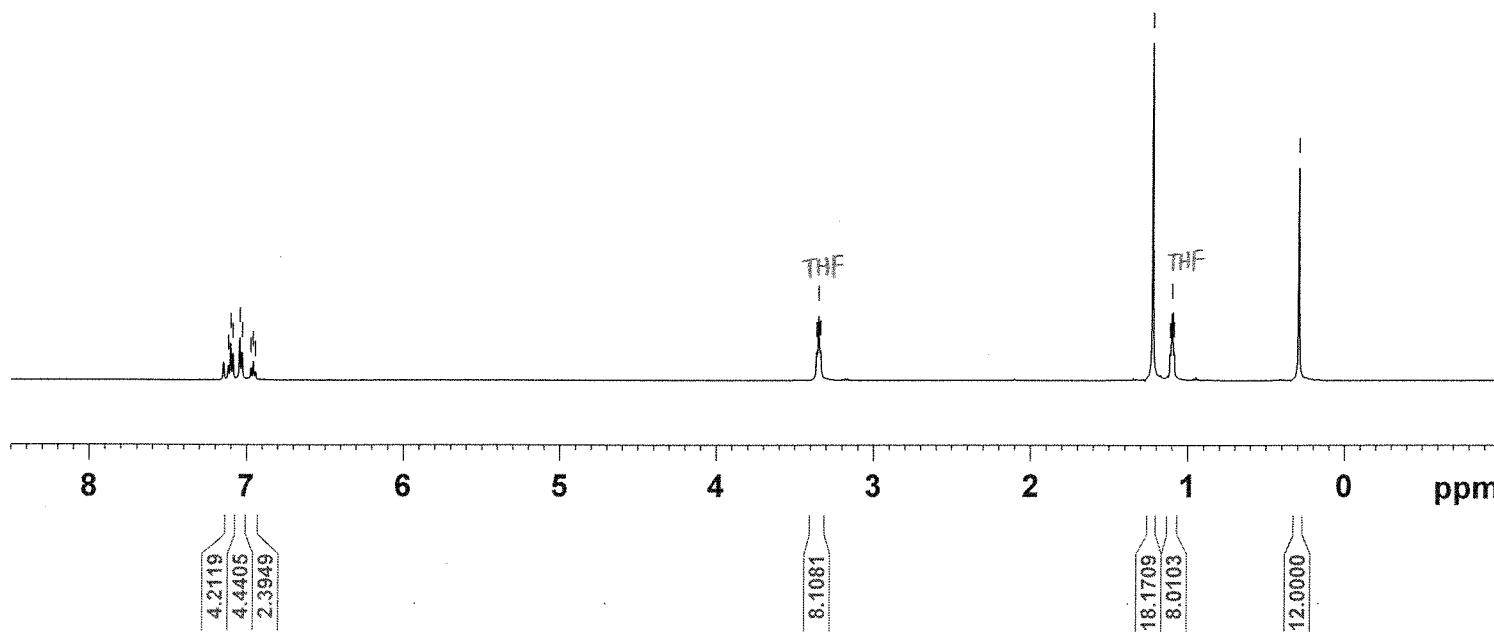

Ex 146 TBDMS dilithioplumbole  $^{13}\text{C}$  NMR in  $\text{C}_6\text{D}_6$

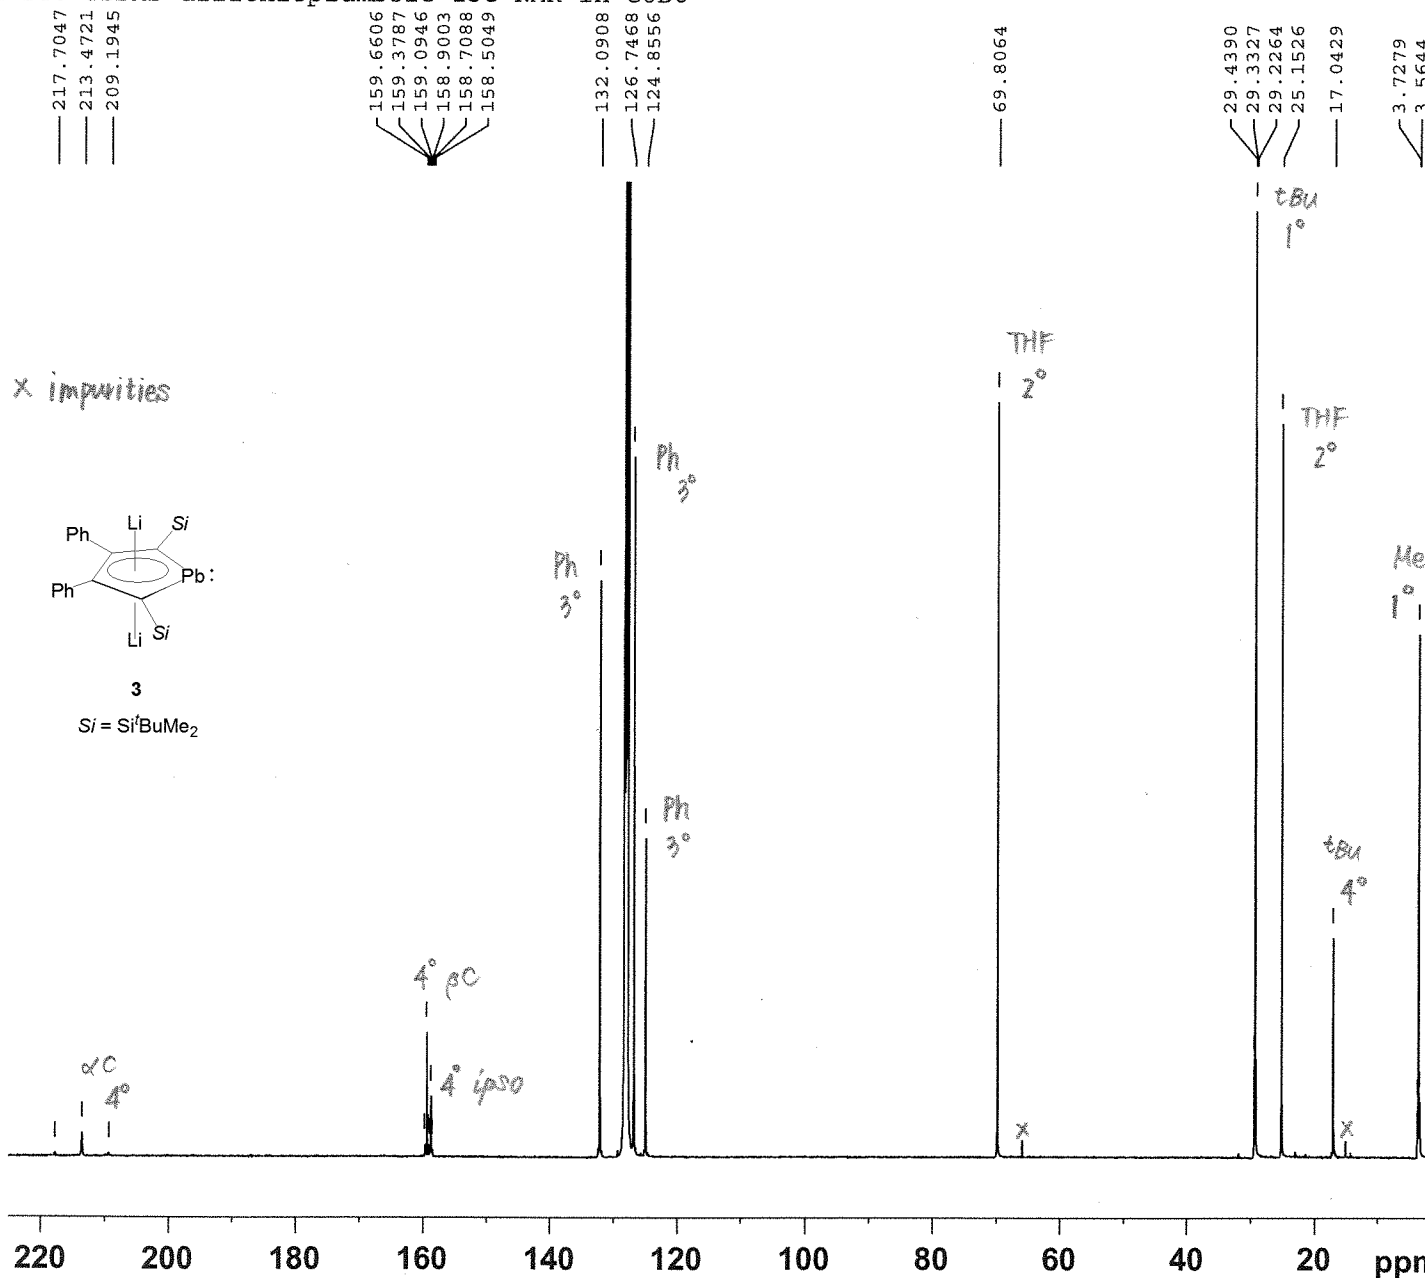

x impurities

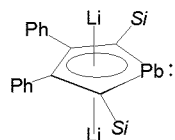

3

$\text{Si} = \text{Si}^t\text{BuMe}_2$

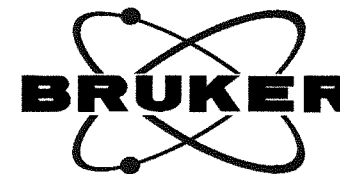

Current Data Parameters  
NAME Allids003MN  
EXPNO 1461  
PROCNO 1

F2 - Acquisition Parameters  
Date\_ 20130517  
Time 16.31  
INSTRUM spect  
PROBHD 5 mm CPQNP 1H/  
PULPROG zgpg30  
TD 65536  
SOLVENT C6D6  
NS 1611  
DS 2  
SWH 29761.904 Hz  
FIDRES 0.454131 Hz  
AQ 1.1010548 sec  
RG 126.99  
DW 16.800 usec  
DE 18.00 usec  
TE 300.0 K  
D1 2.00000000 sec  
D11 0.03000000 sec  
TD0 1

===== CHANNEL f1 =====  
NUC1  $^{13}\text{C}$   
P1 12.00 usec  
PLW1 15.50000000 W  
SFO1 100.6248425 MHz

===== CHANNEL f2 =====  
CPDPRG2 waltz16  
NUC2  $^1\text{H}$   
PCPD2 90.00 usec  
PLW2 5.19999981 W  
PLW12 0.14444400 W  
PLW13 0.11700000 W  
SFO2 400.1316005 MHz

F2 - Processing parameters  
SI 32768  
SF 100.6127365 MHz  
WDW EM  
SSB 0  
LB 2.00 Hz  
GB 0  
PC 1.40

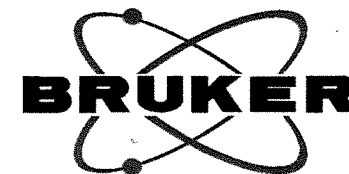

— 2572.5166

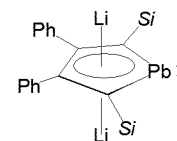

3  
Si = Si<sup>t</sup>BuMe<sub>2</sub>

```

NAME          A13MC116AZ
EXPNO         1
PROCNO        1
Date_         20130517
Time          18.02
INSTRUM       spect
PROBHD        5 mm PABBO BB-
PULPROG       zgpg
TD            65536
SOLVENT       C6D6
NS            3016
DS            2
SWH           208333.328 Hz
FIDRES        3.178914 Hz
AQ            0.1573364 sec
RG            203
DW            2.400 usec
DE            65.00 usec
TE            300.6 K
D1            2.00000000 sec
D11           0.03000000 sec
TD0           1
    
```

```

===== CHANNEL f1 =====
NUC1          207Pb
P1            12.00 usec
PL1           0.00 dB
SFO1          104.9230988 MHz
    
```

```

===== CHANNEL f2 =====
CPDPRG2       waltz16
NUC2           1H
PCPD2         80.00 usec
PL2           2.40 dB
PL12          19.02 dB
PL13          22.02 dB
PL2W          15.17711735 W
PL12W         0.33051354 W
PL13W         0.16564916 W
SFO2          500.0320005 MHz
SI            65536
SF            104.6094793 MHz
WDW           EM
SSB           0
LB            10.00 Hz
GB            0
PC            1.40
    
```

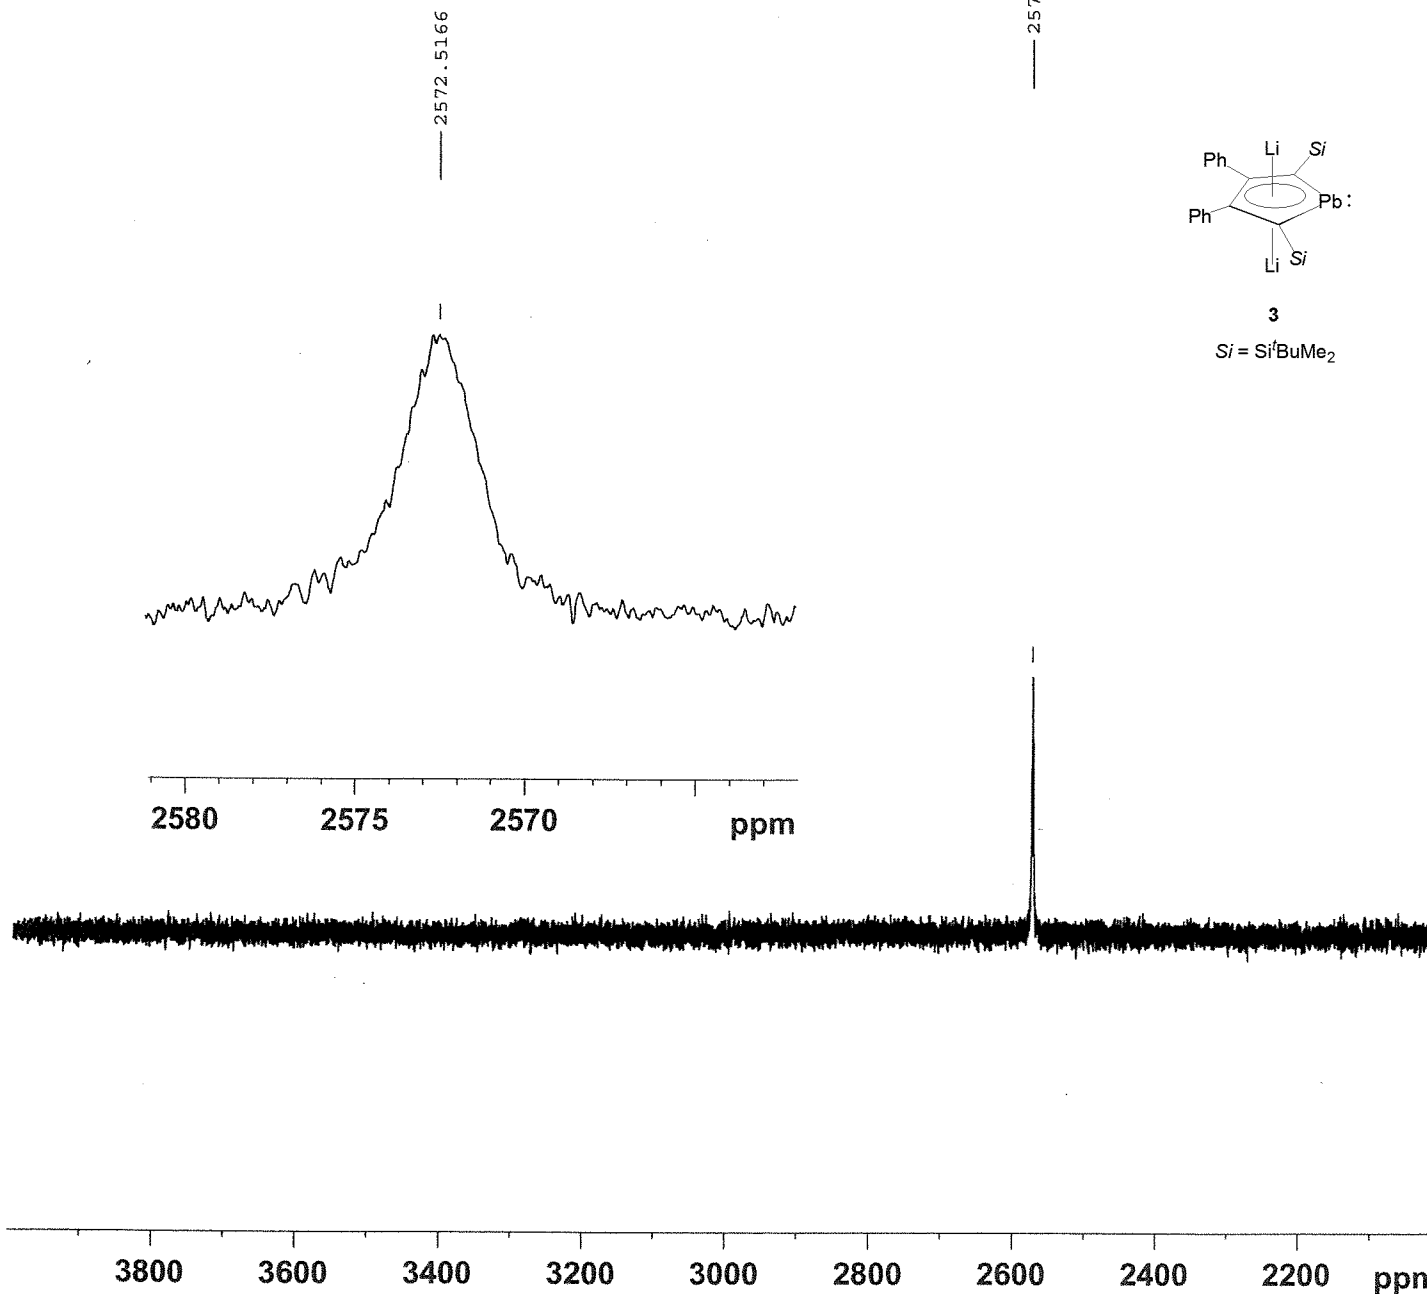

TBDMS Ph dilithioplumbole 7Li in C6D6

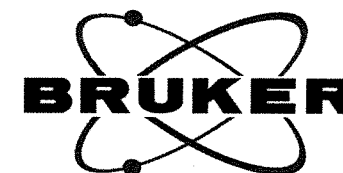

NAME A13MC116BU  
EXPNO 1  
PROCNO 1  
Date\_ 20130517  
Time\_ 14.55  
INSTRUM spect  
PROBHD 5 mm PABBO BB-  
PULPROG zgpg30  
TD 262144  
SOLVENT C6D6  
NS 16  
DS 0  
SWH 19531.250 Hz  
FIDRES 0.074506 Hz  
AQ 6.7109365 sec  
RG 203  
DW 25.600 usec  
DE 6.50 usec  
TE 301.0 K  
D1 2.00000000 sec  
D11 0.03000000 sec  
TD0 1

===== CHANNEL f1 =====  
NUC1 7Li  
P1 20.00 usec  
PL1 1.00 dB  
SFO1 194.3695082 MHz

===== CHANNEL f2 =====  
CPDPRG2 waltz16  
NUC2 1H  
PCPD2 80.00 usec  
PL2 1.75 dB  
PL12 19.50 dB  
PL13 19.50 dB  
PL2W 18.63472366 W  
PL12W 0.31284049 W  
PL13W 0.31284049 W  
SFO2 500.1330885 MHz  
SI 131072  
SF 194.3695384 MHz  
WDW EM  
SSB 0  
LB 0.30 Hz  
GB 0  
PC 1.40

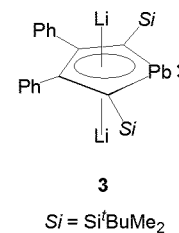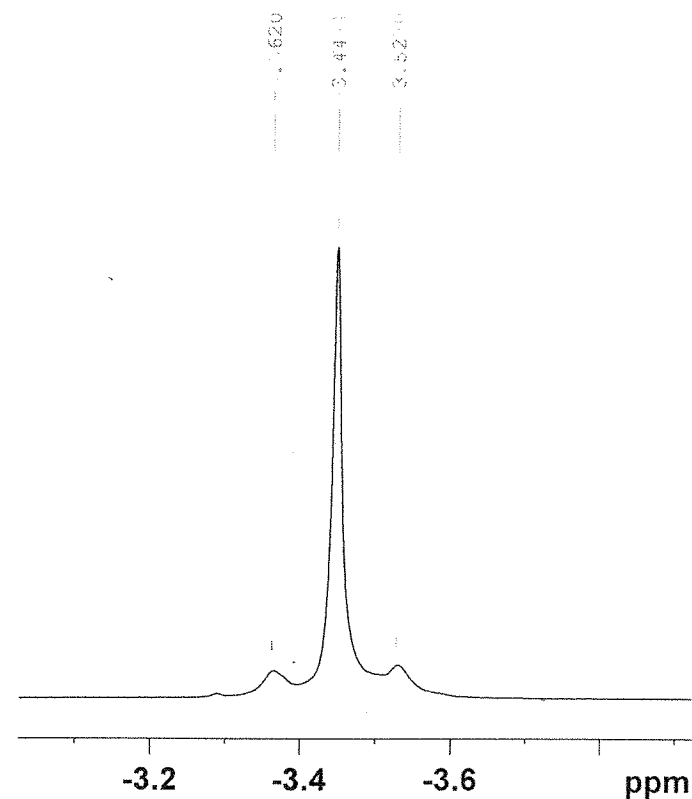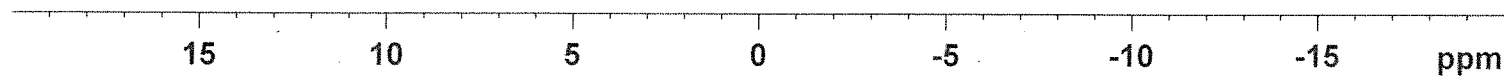

TBDMS Ph dilithioplumbole 7Li in THF-d8 at RT

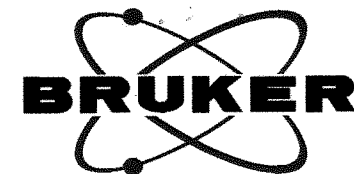

NAME A13MC116Li  
EXPNO 1  
PROCNO 1  
Date\_ 20141224  
Time 17.04  
INSTRUM spect  
PROBHD 5 mm PABBO BB-  
PULPROG zg30  
TD 65536  
SOLVENT THF  
NS 16  
DS 4  
SWH 96153.844 Hz  
FIDRES 1.467191 Hz  
AQ 0.3408372 sec  
RG 203  
DW 5.200 usec  
DE 6.50 usec  
TE 299.9 K  
D1 2.00000000 sec  
TD0 1

===== CHANNEL f1 =====  
NUC1 7Li  
P1 15.00 usec  
PL1 3.00 dB  
PL1W 37.76776123 W  
SFO1 194.3299925 MHz  
SI 32768  
SF 194.3306440 MHz  
WDW EM  
SSB 0  
LB 1.00 Hz  
GB 0  
PC 1.40

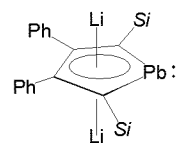

3  
Si = Si<sup>t</sup>BuMe<sub>2</sub>

-2.4107

-2.4107

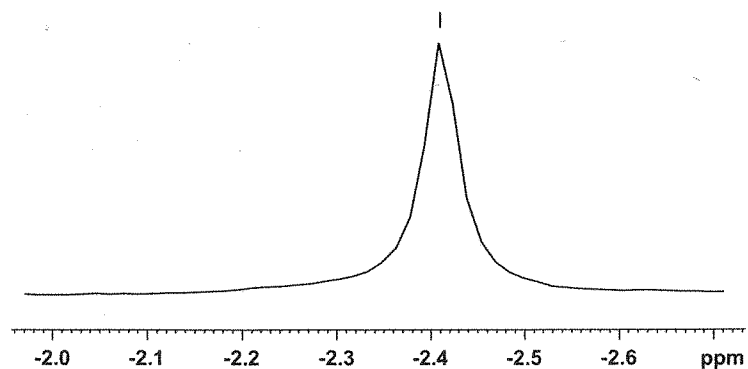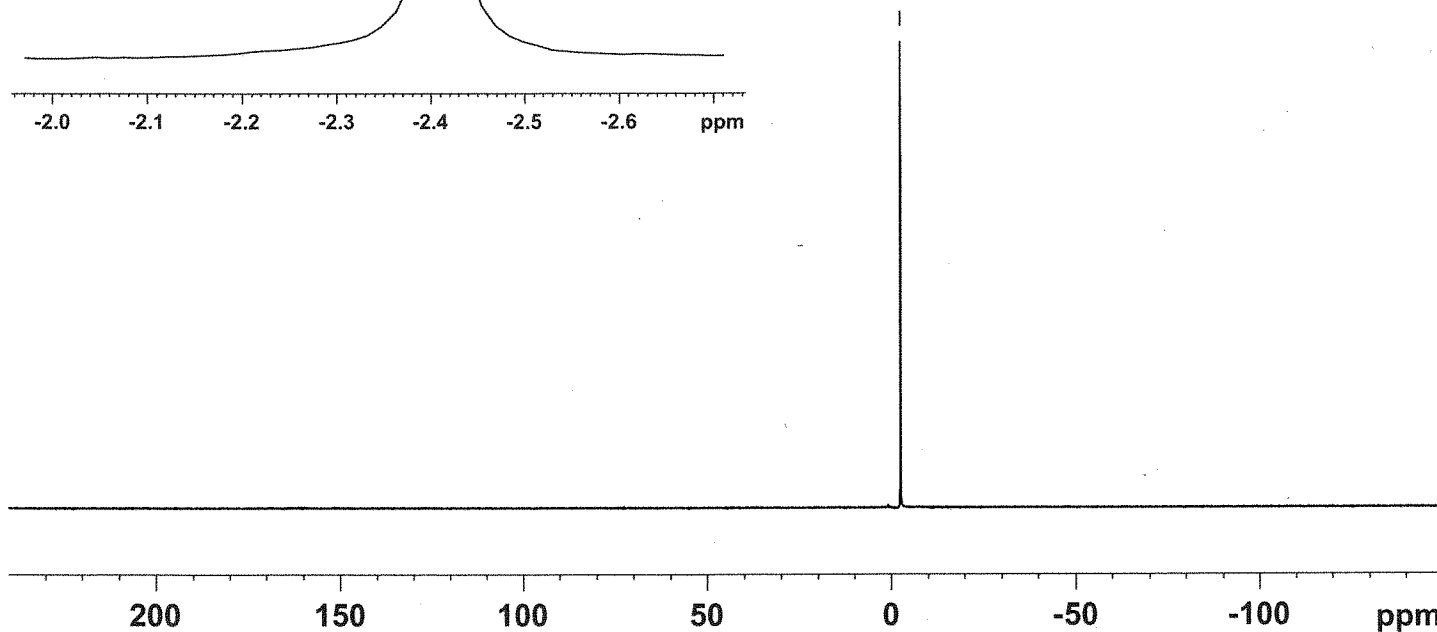

TBDMS Ph dilithioplumbole 7Li in THF-d8 at 203K

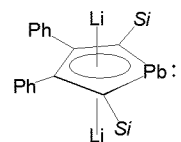

3

Si = Si<sup>t</sup>BuMe<sub>2</sub>

-2.2423  
-5.0112

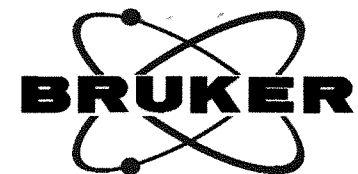

NAME A13MC116Li  
EXPNO 10  
PROCNO 1  
Date 20141224  
Time 18.17  
INSTRUM spect  
PROBHD 5 mm PABBO BB-  
PULPROG zg30  
TD 65536  
SOLVENT THF  
NS 32  
DS 4  
SWH 96153.844 Hz  
FIDRES 1.467191 Hz  
AQ 0.3408372 sec  
RG 203  
DW 5.200 usec  
DE 6.50 usec  
TE 206.8 K  
D1 2.00000000 sec  
TD0 1

===== CHANNEL f1 =====  
NUC1 7Li  
P1 15.00 usec  
PL1 3.00 dB  
PL1W 37.76776123 W  
SFO1 194.3299925 MHz  
SI 32768  
SF 194.3306440 MHz  
WDW EM  
SSB 0  
LB 1.00 Hz  
GB 0  
PC 1.40

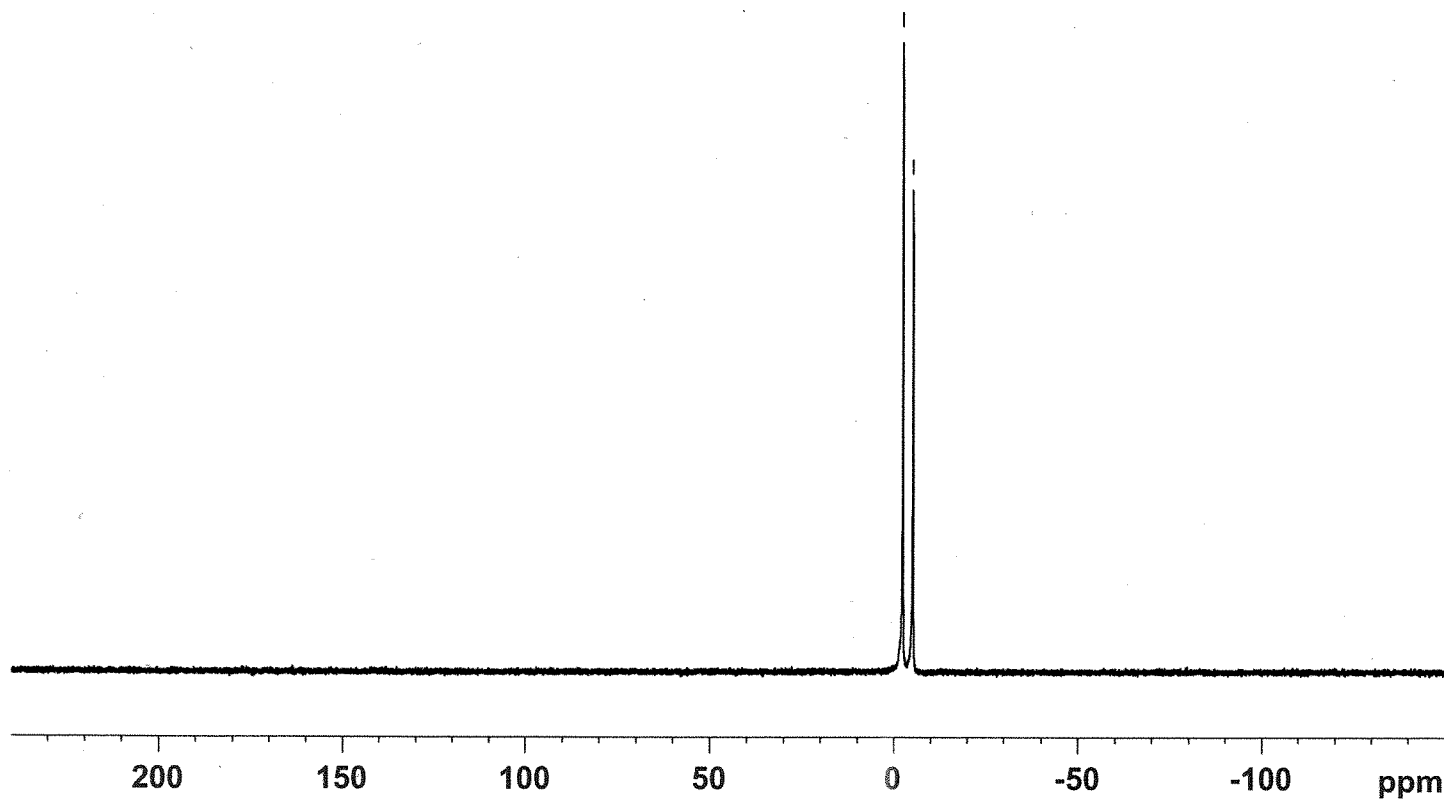

TBDMS Ph dilithioplumbole 29Si in C6D6

5.6097

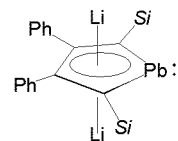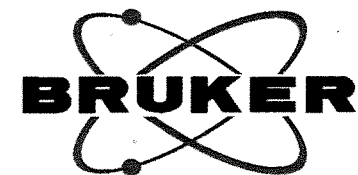

NAME A13MC116AX  
EXPNO 1  
PROCNO 1  
Date\_ 20130517  
Time 15.06  
INSTRUM spect  
PROBHD 5 mm PABBO BB-  
PULPROG zgig  
TD 65536  
SOLVENT C6D6  
NS 440  
DS 4  
SWH 39682.539 Hz  
FIDRES 0.605507 Hz  
AQ 0.8258036 sec  
RG 203  
DW 12.600 usec  
DE 6.50 usec  
TE 300.4 K  
D1 5.00000000 sec  
D11 0.03000000 sec  
TD0 1

===== CHANNEL f1 =====  
NUC1 29Si  
P1 15.00 usec  
PL1 3.00 dB  
PL1W 37.76776123 W  
SFO1 99.3319610 MHz

===== CHANNEL f2 =====  
CPDPRG2 waltz16  
NUC2 1H  
PCPD2 80.00 usec  
PL2 2.40 dB  
PL12 19.02 dB  
PL2W 15.17711735 W  
PL12W 0.33051354 W  
SFO2 500.0320001 MHz  
SI 32768  
SF 99.3418950 MHz  
WDW EM  
SSB 0  
LB 1.00 Hz  
GB 0  
PC 1.40

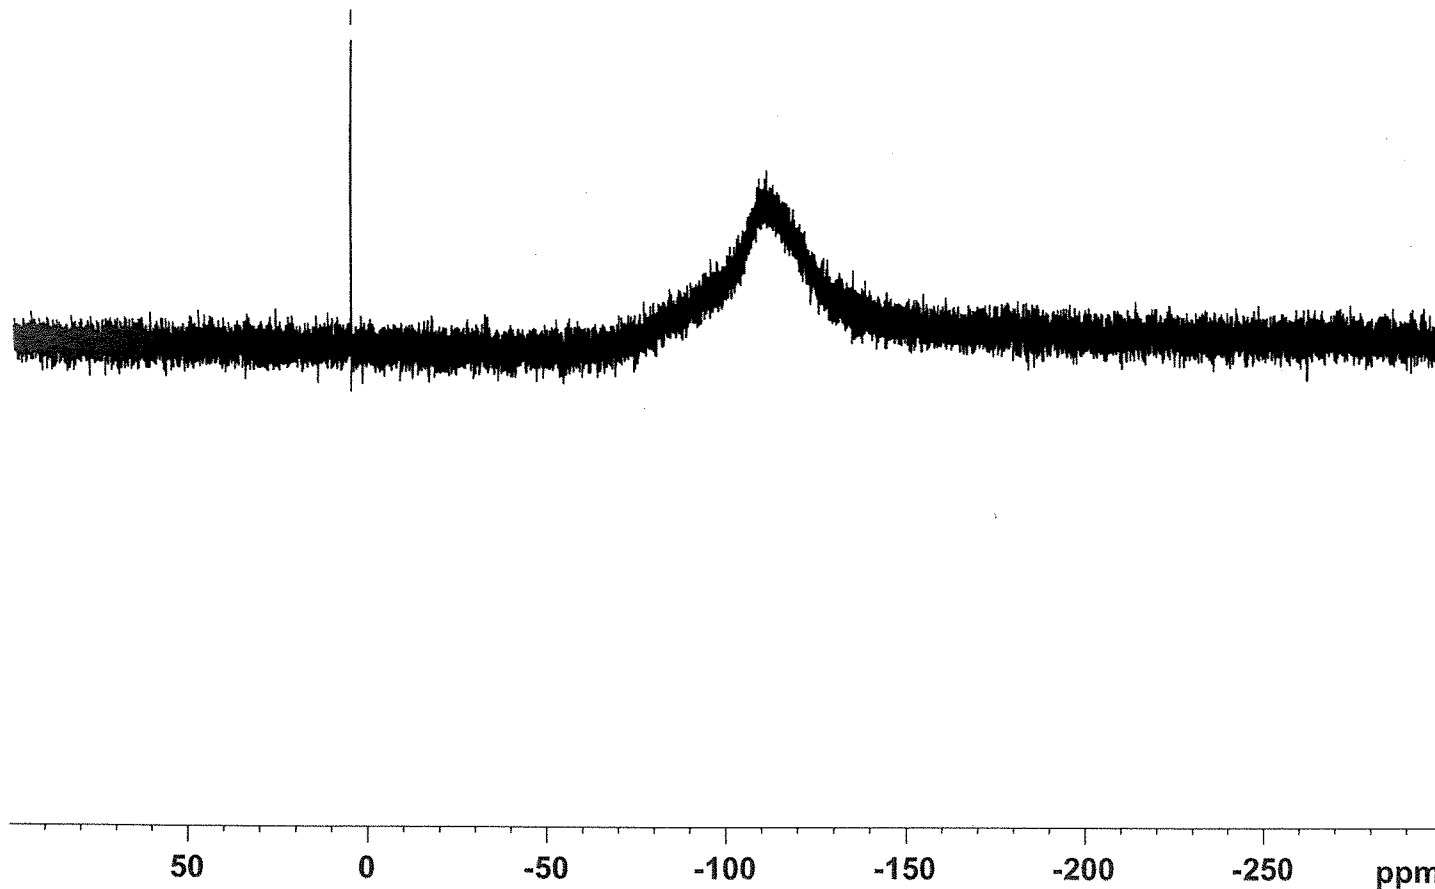



Wx 319 1,1' dilithiobiolumbole comp. 1H in THF a C6D6

6.8292  
6.6180

0.9833  
0.9240  
0.9231

0.0823  
0.0665  
0.0399

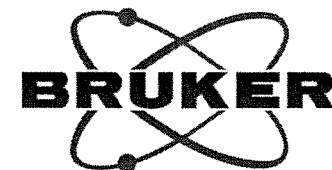

Current Data Parameters  
NAME A13MC116EB  
EXPNO 1  
PROCNO 1

F2 - Acquisition Parameters  
Date 20140225  
Time 14.35  
INSTRUM spect  
PROBHD 5 mm PABBO BB-  
PULPROG zg30  
TD 65536  
SOLVENT C6D6  
NS 8  
DS 2  
SWH 10330.578 Hz  
FIDRES 0.157632 Hz  
AQ 3.1719923 sec  
RG 2.8  
DW 48.400 usec  
DE 6.50 usec  
TE 299.3 K  
D1 1.00000000 sec  
TD0 1

===== CHANNEL f1 =====  
NUC1 1H  
P1 12.00 usec  
PL1 2.60 dB  
PL1W 15.32226563 W  
SFO1 500.1330885 MHz

F2 - Processing parameters  
SI 32768  
SF 500.1300011 MHz  
WDW EM  
SSB 0  
LB 0.30 Hz  
GB 0  
PC 1.00

O Et2O

Δ THF

D Hexane

V C6D6

X impurities

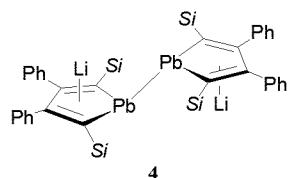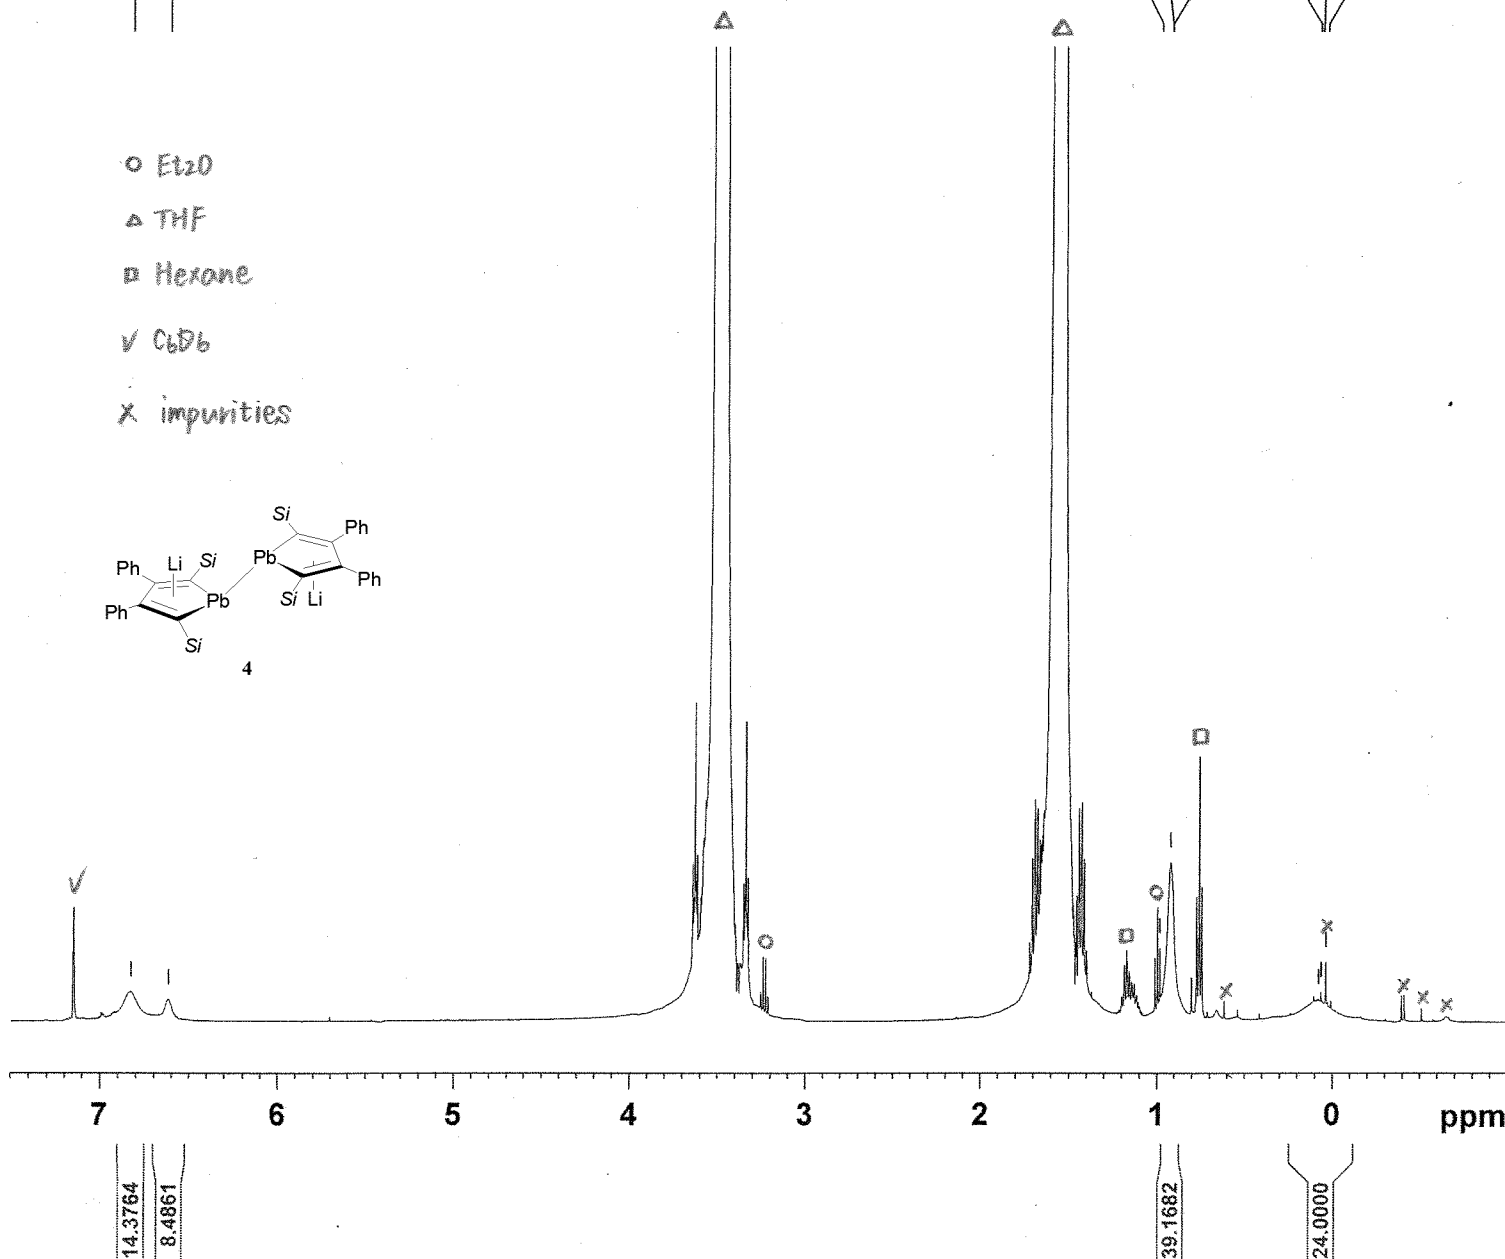

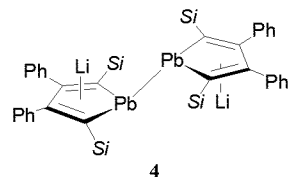

—1390.5585

—1390.5585

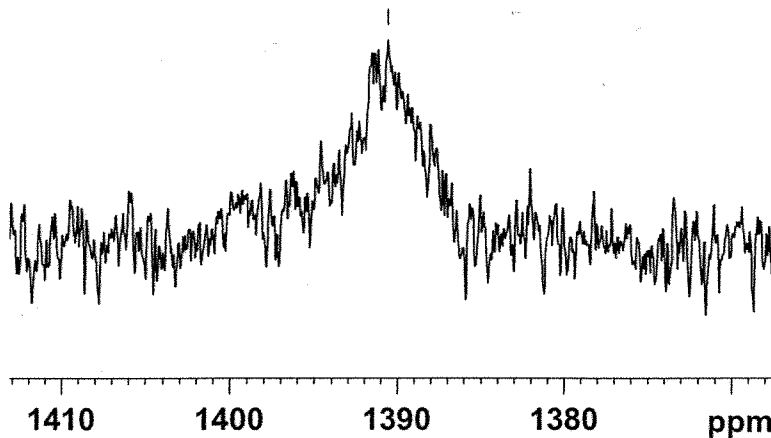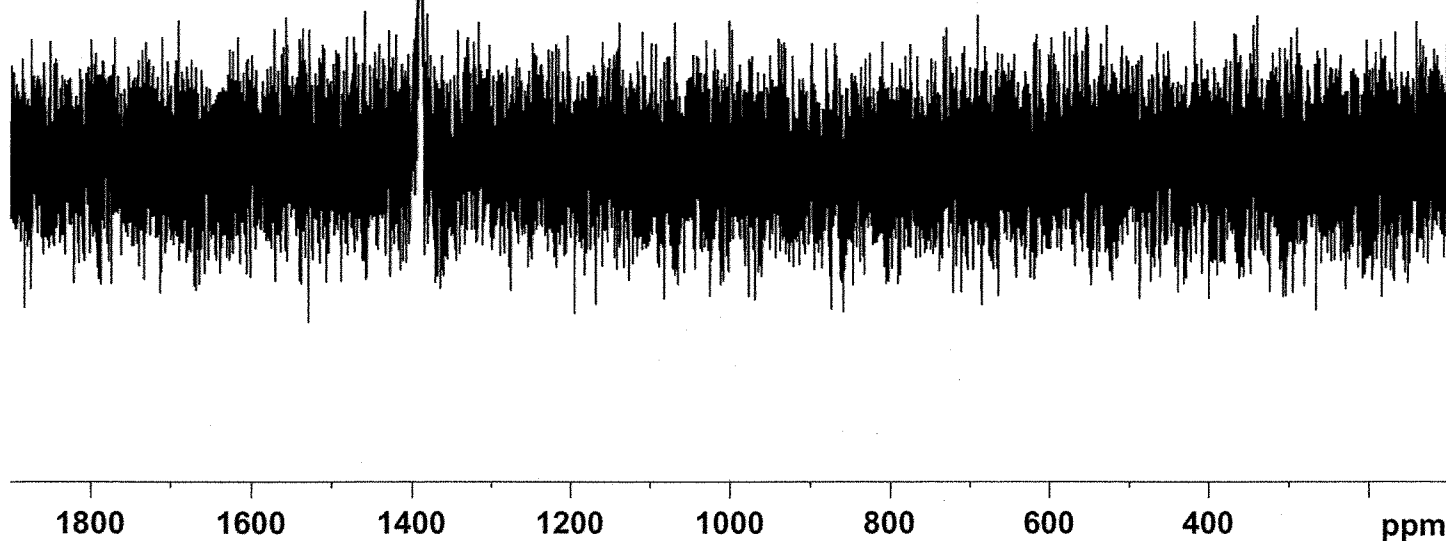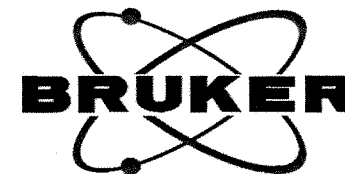

NAME A13MC116MU  
 EXPNO 1  
 PROCNO 1  
 Date\_ 20140225  
 Time 19.46  
 INSTRUM spect  
 PROBHD 5 mm PABBO BB-  
 PULPROG zgpg  
 TD 65536  
 SOLVENT C6D6  
 NS 2040  
 DS 2  
 SWH 208333.328 Hz  
 FIDRES 3.178914 Hz  
 AQ 0.1573364 sec  
 RG 203  
 DW 2.400 usec  
 DE 65.00 usec  
 TE 300.7 K  
 D1 2.00000000 sec  
 D11 0.03000000 sec  
 TD0 1

===== CHANNEL f1 =====  
 NUC1 207Pb  
 P1 12.00 usec  
 PL1 0.00 dB  
 SFO1 104.7138803 MHz

===== CHANNEL f2 =====  
 CPDPRG2 waltz16  
 NUC2 1H  
 PCPD2 80.00 usec  
 PL2 2.40 dB  
 PL12 19.02 dB  
 PL13 22.02 dB  
 PL2W 15.17711735 W  
 PL12W 0.33051354 W  
 PL13W 0.16564916 W  
 SFO2 500.0320005 MHz  
 SI 65536  
 SF 104.6094793 MHz  
 WDW EM  
 SSB 0  
 LB 10.00 Hz  
 GB 0  
 PC 1.40

Ex 319 1,1'-dilithiobi-plumbole comp. 7Li in THF and D6

— -0.3163

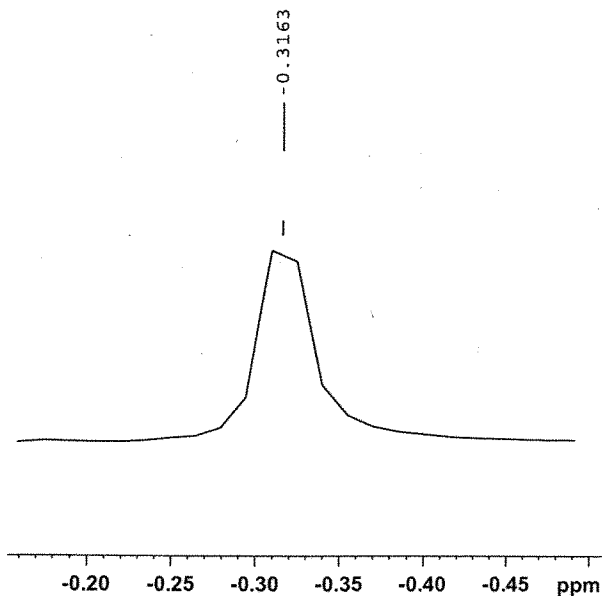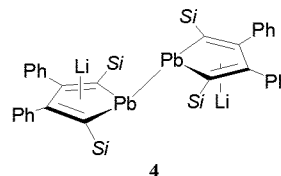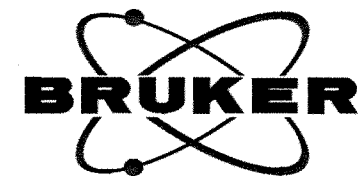

NAME A13MC116MS  
EXPNO 1  
PROCNO 1  
Date\_ 20140225  
Time 12.01  
INSTRUM spect  
PROBHD 5 mm PABBO BB-  
PULPROG zg30  
TD 65536  
SOLVENT C6D6  
NS 8  
DS 4  
SWH 96153.844 Hz  
FIDRES 1.467191 Hz  
AQ 0.3408372 sec  
RG 203  
DW 5.200 usec  
DE 6.50 usec  
TE 299.8 K  
D1 2.00000000 sec  
TD0 1

===== CHANNEL f1 =====  
NUC1 7Li  
P1 15.00 usec  
PL1 3.00 dB  
PL1W 37.76776123 W  
SFO1 194.3299925 MHz  
SI 32768  
SF 194.3306440 MHz  
WDW EM  
SSB 0  
LB 1.00 Hz  
GB 0  
PC 1.40

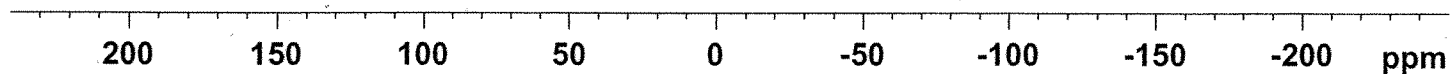

Ex 319 1,1'-dilithiobi-plumbole comp. 29 Si in THF and C6D6

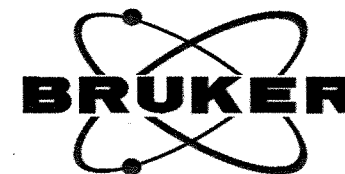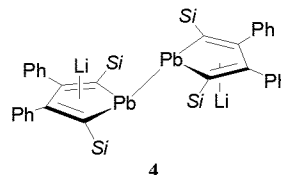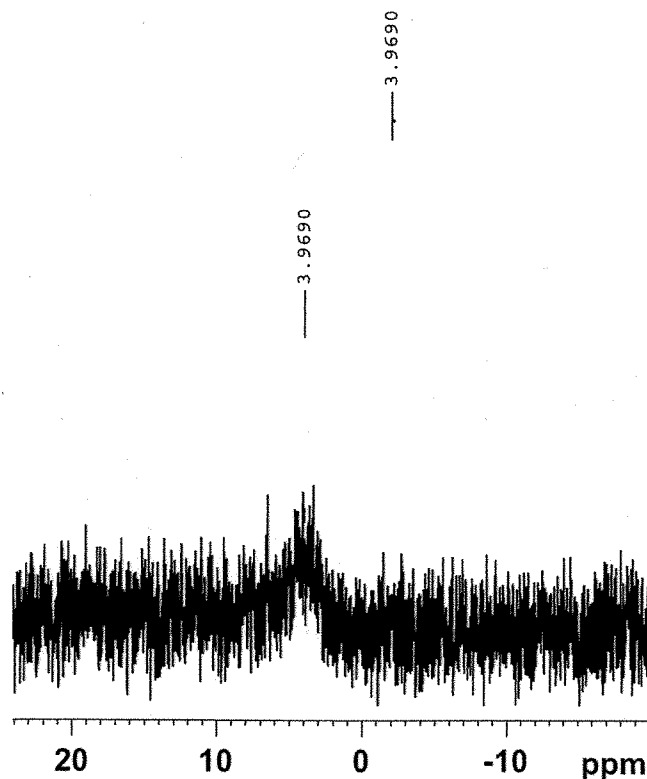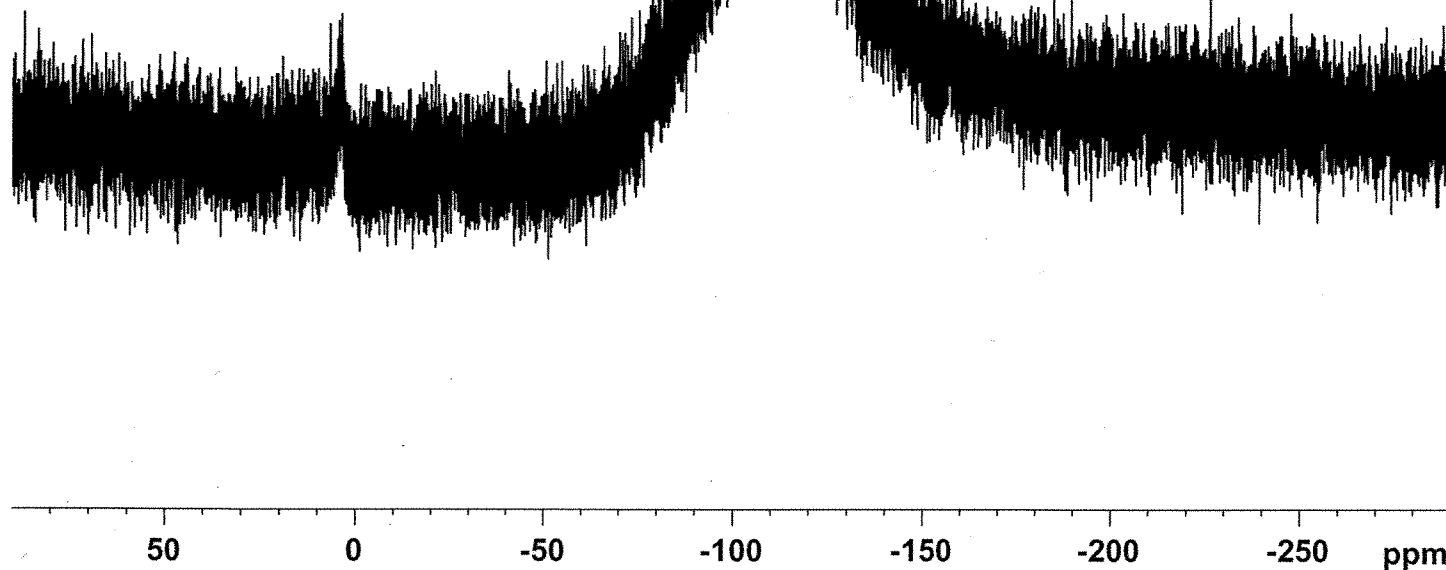

```

NAME          A13MC116MT
EXPNO          1
PROCNO         1
Date_          20140225
Time           12.07
INSTRUM        spect
PROBHD         5 mm PABBO BB-
PULPROG        zgig
TD             65536
SOLVENT        C6D6
NS             1004
DS             4
SWH            39682.539 Hz
FIDRES         0.605507 Hz
AQ             0.8258036 sec
RG             203
DW             12.600 usec
DE             6.50 usec
TE             300.0 K
D1             5.00000000 sec
D11            0.03000000 sec
TD0            1
  
```

```

===== CHANNEL f1 =====
NUC1            29Si
P1             15.00 usec
PL1             3.00 dB
PL1W           37.76776123 W
SFO1           99.3319610 MHz
  
```

```

===== CHANNEL f2 =====
CPDPRG2         waltz16
NUC2             1H
PCPD2           80.00 usec
PL2             2.40 dB
PL12            19.02 dB
PL2W           15.17711735 W
PL12W           0.33051354 W
SFO2           500.0320001 MHz
SI              32768
SF             99.3418950 MHz
WDW             EM
SSB             0
LB             1.00 Hz
GB             0
PC             1.40
  
```

1,1'-dilithiobi-plumbole 1H in THF-d8 (cal.@1.79) <sup>223</sup>BP

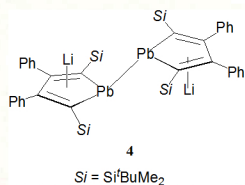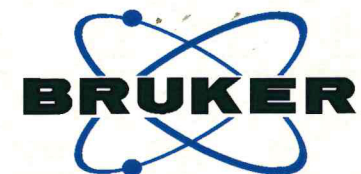

NAME A13MC116VTH223K  
EXPNO 455  
PROCNO 1  
Date\_ 20150109  
Time 15.26  
INSTRUM spect  
PROBHD 5 mm PABBO BB-  
PULPROG zg30  
TD 65536  
SOLVENT THF  
NS 8  
DS 2  
SWH 10330.578 Hz  
FIDRES 0.157632 Hz  
AQ 3.1719923 sec  
RG 90.5  
DW 48.400 usec  
DE 6.50 usec  
TE 222.3 K  
D1 1.00000000 sec  
TD0 1

===== CHANNEL f1 =====  
NUC1 1H  
P1 11.80 usec  
PL1 2.40 dB  
PL1W 15.17711735 W  
SFO1 500.0330885 MHz  
SI 32768  
SF 500.0290845 MHz  
WDW EM  
SSB 0  
LB 0.30 Hz  
GB 0  
PC 1.40

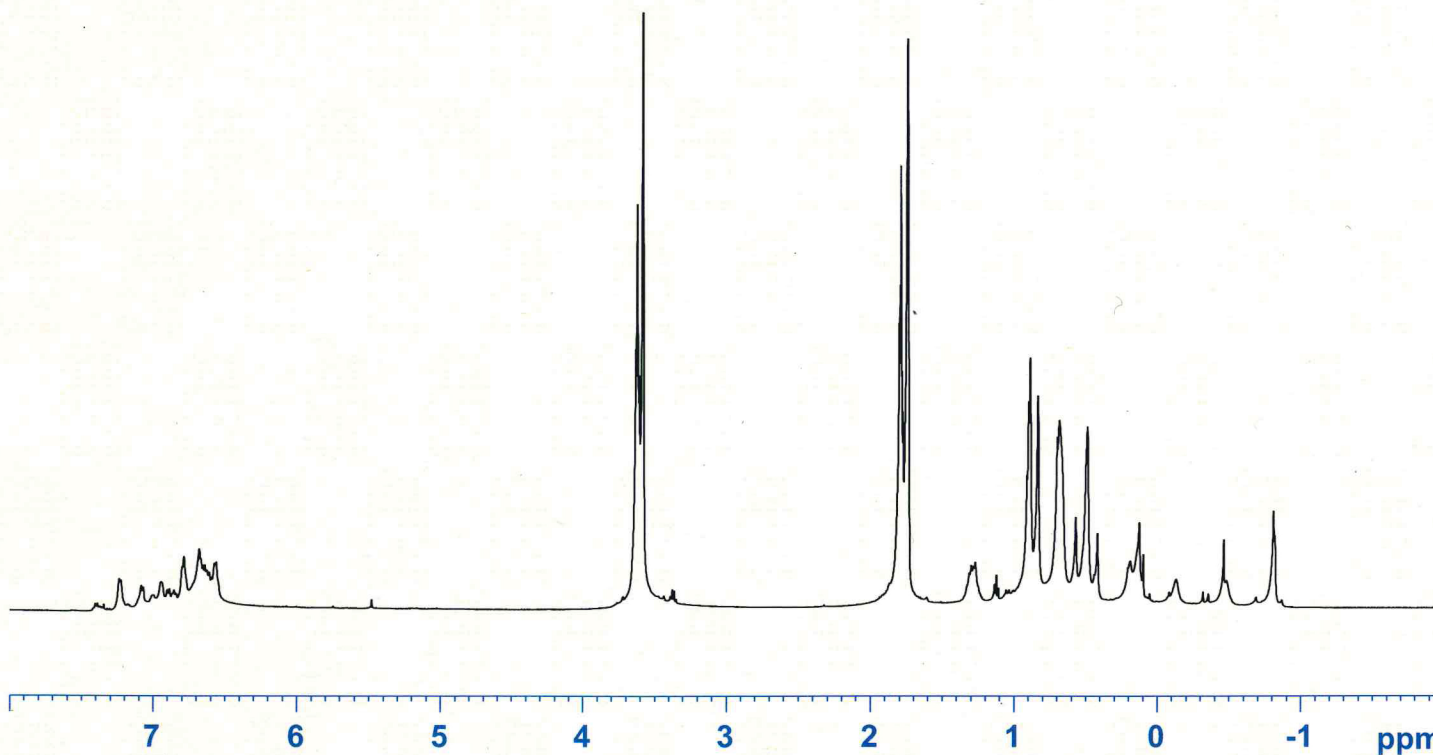

1,1'-dilithiobi-plumbale 13C in THF-d8 (cal@26.15, 223K)

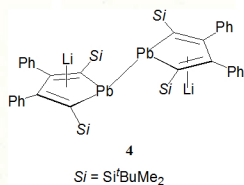

36.3556  
34.0431  
24.9969  
24.7448  
20.7825  
19.4356  
17.0024  
15.8713  
5.6031  
2.7371  
1.9965  
-0.4185  
-1.2558

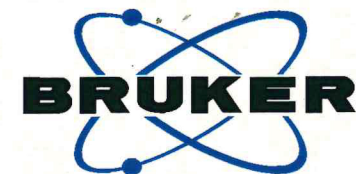

NAME A13MC116VTC223K  
EXPNO 455  
PROCNO 1  
Date\_ 20150109  
Time 15.36  
INSTRUM spect  
PROBHD 5 mm PABBO BB-  
PULPROG zgpg30  
TD 65536  
SOLVENT THF  
NS 1432  
DS 2  
SWH 40760.871 Hz  
FIDRES 0.621962 Hz  
AQ 0.8039582 sec  
RG 203  
DW 12.267 usec  
DE 6.50 usec  
TE 222.9 K  
D1 2.00000000 sec  
D11 0.03000000 sec  
TD0 1

===== CHANNEL f1 =====  
NUC1 13C  
P1 9.80 usec  
PL1 0.00 dB  
PL1W 100.47545624 W  
SFO1 125.7477319 MHz

===== CHANNEL f2 =====  
CPDPRG2 waltz16  
NUC2 1H  
PCPD2 80.00 usec  
PL2 2.40 dB  
PL12 19.02 dB  
PL13 22.02 dB  
PL2W 15.17711735 W  
PL12W 0.33051354 W  
PL13W 0.16564916 W  
SFO2 500.0316016 MHz  
SI 16384  
SF 125.7321636 MHz  
WDW EM  
SSB 0  
LB 1.00 Hz  
GB 0  
PC 1.40

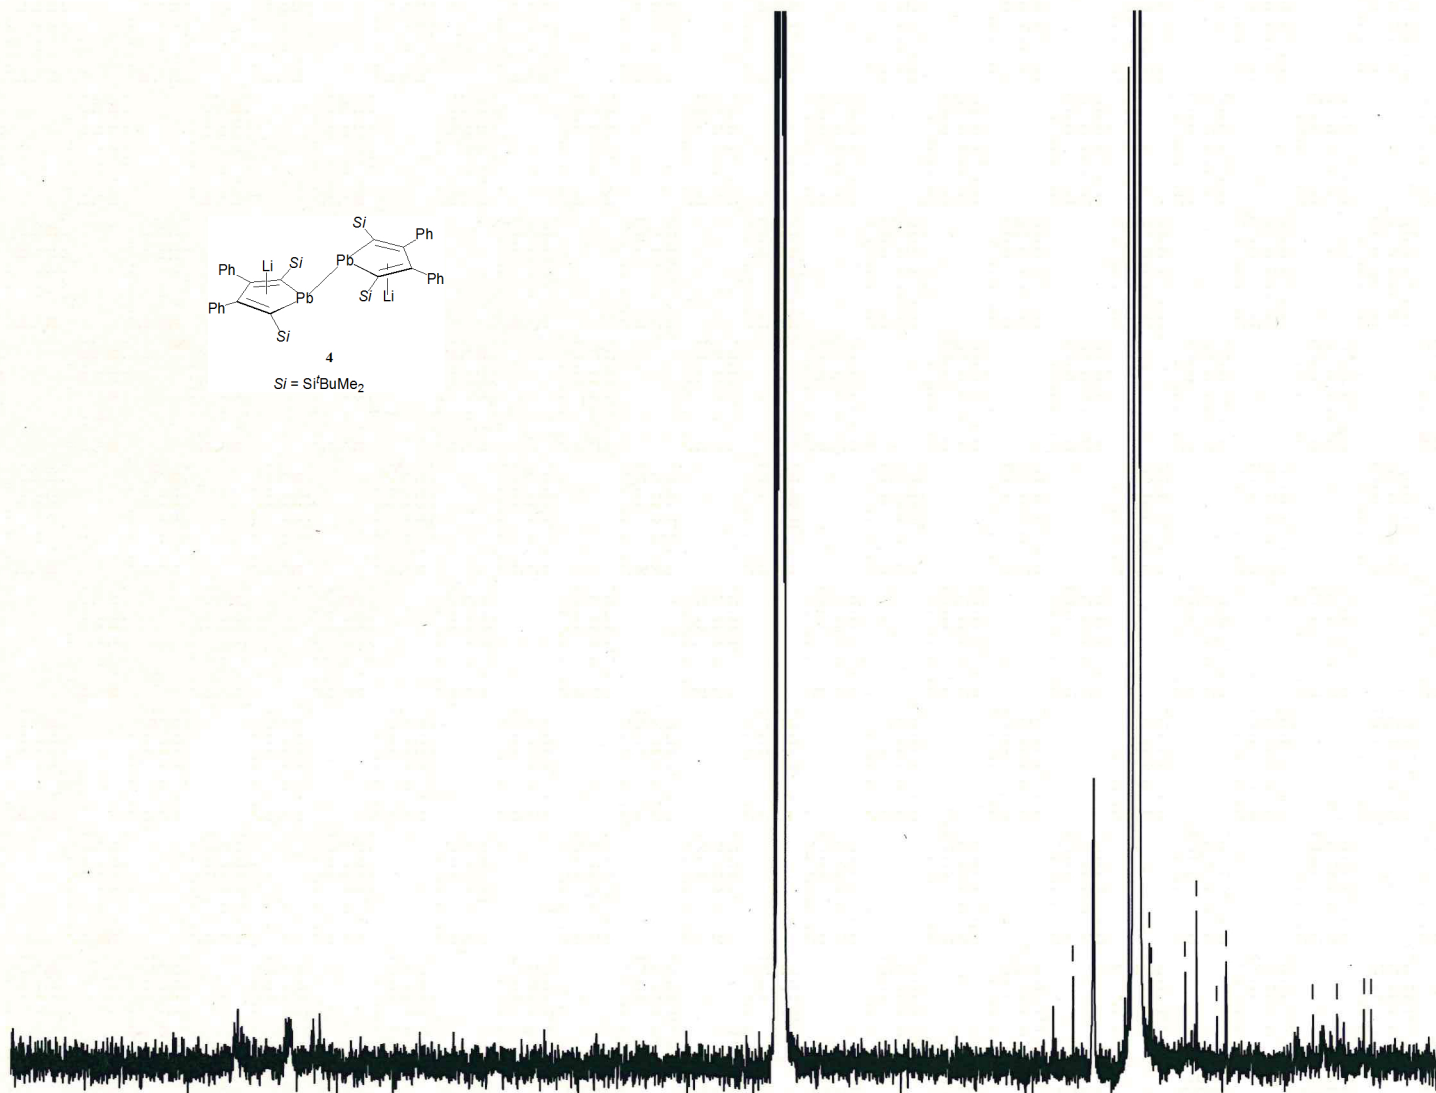

150 140 130 120 110 100 90 80 70 60 50 40 30 20 10 ppm

1,1'-dilithiobiplumbole 207Pb in THF-d8 223K

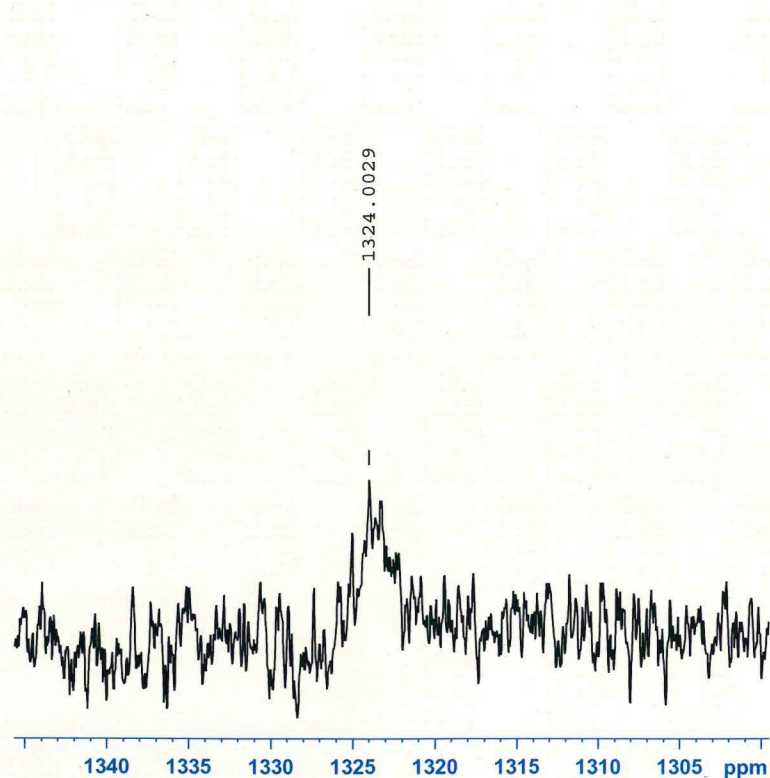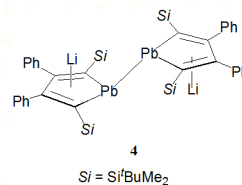

1324.0029

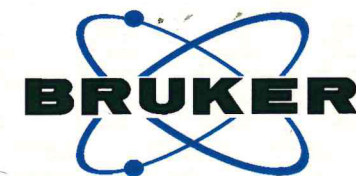

NAME A13MC116VTPb223K  
EXPNO 455  
PROCNO 1  
Date\_ 20150109  
Time 16.44  
INSTRUM spect  
PROBHD 5 mm PABBO BB-  
PULPROG zgpg  
TD 65536  
SOLVENT THF  
NS 936  
DS 2  
SWH 208333.328 Hz  
FIDRES 3.178914 Hz  
AQ 0.1573364 sec  
RG 203  
DW 2.400 usec  
DE 65.00 usec  
TE 219.1 K  
D1 2.00000000 sec  
D11 0.03000000 sec  
TD0 1

===== CHANNEL f1 =====  
NUC1 207Pb  
P1 12.00 usec  
PL1 0.00 dB  
SFO1 104.7661849 MHz

===== CHANNEL f2 =====  
CPDPRG2 waltz16  
NUC2 1H  
PCPD2 80.00 usec  
PL2 2.40 dB  
PL12 19.02 dB  
PL13 22.02 dB  
PL2W 15.17711735 W  
PL12W 0.33051354 W  
PL13W 0.16564916 W  
SFO2 500.0320005 MHz  
SI 65536  
SF 104.6094793 MHz  
WDW EM  
SSB 0  
LB 10.00 Hz  
GB 0  
PC 1.40

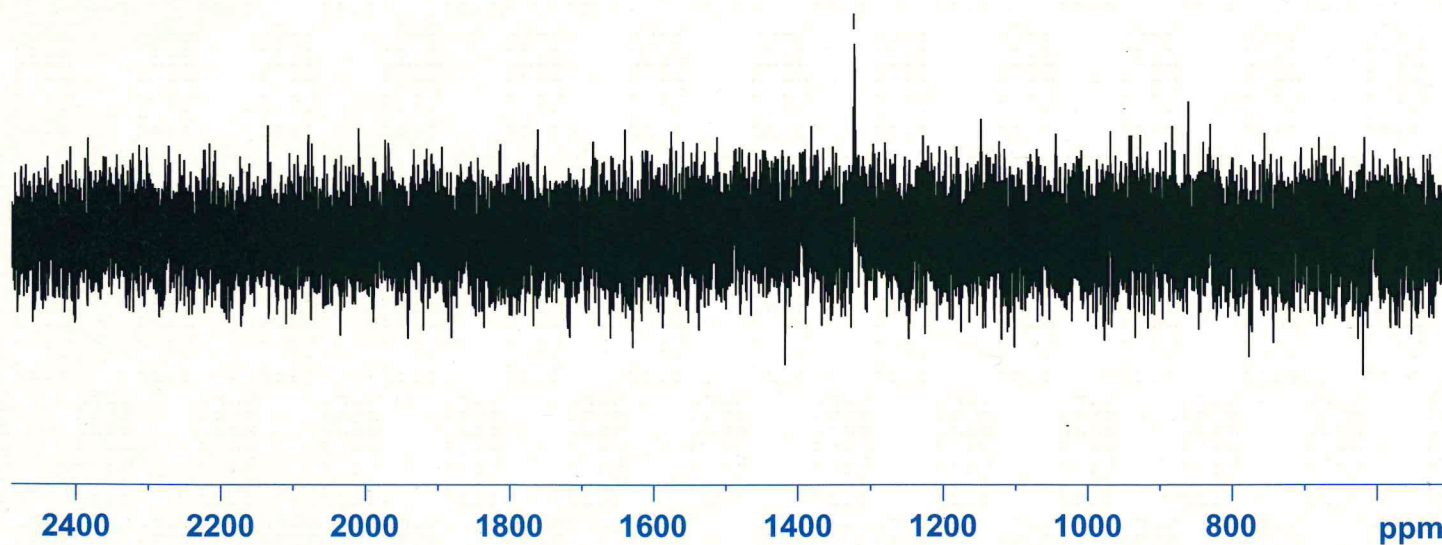



1,1'-dilithiobiplumbole 7Li 223K in THF-d8

--2.2570

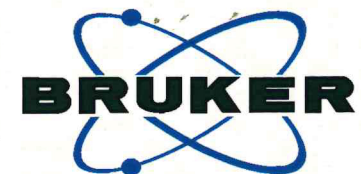

NAME A13MC116VTLi223K  
EXPNO 455  
PROCNO 1  
Date\_ 20150109  
Time 15.30  
INSTRUM spect  
PROBHD 5 mm PABBO BB-  
PULPROG zg30  
TD 65536  
SOLVENT THF  
NS 32  
DS 4  
SWH 96153.844 Hz  
FIDRES 1.467191 Hz  
AQ 0.3408372 sec  
RG 203  
DW 5.200 usec  
DE 6.50 usec  
TE 222.7 K  
D1 2.00000000 sec  
TD0 1

===== CHANNEL f1 =====  
NUC1 7Li  
P1 15.00 usec  
PL1 3.00 dB  
PL1W 37.76776123 W  
SFO1 194.3299925 MHz  
SI 32768  
SF 194.3306440 MHz  
WDW EM  
SSB 0  
LB 1.00 Hz  
GB 0  
PC 1.40

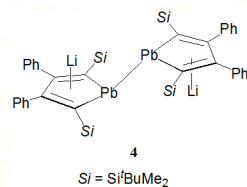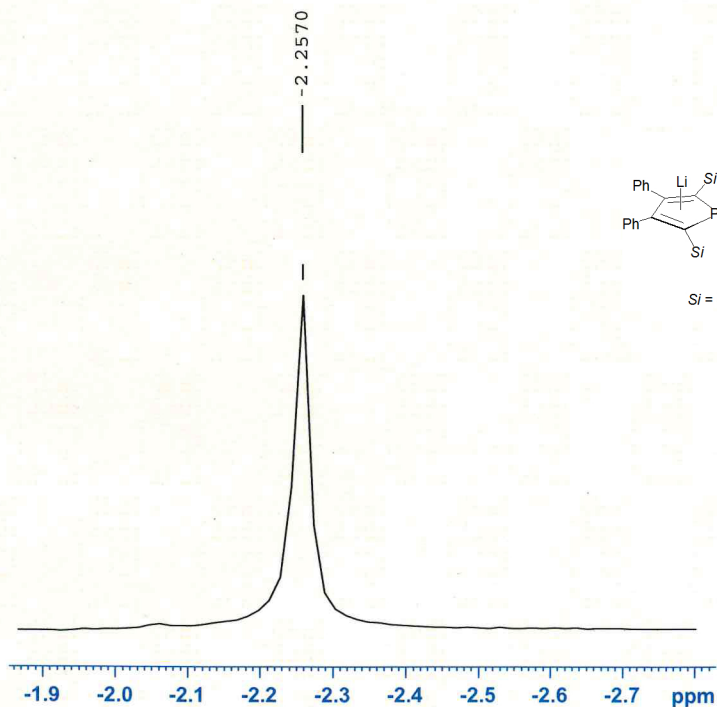

-1.9 -2.0 -2.1 -2.2 -2.3 -2.4 -2.5 -2.6 -2.7 ppm

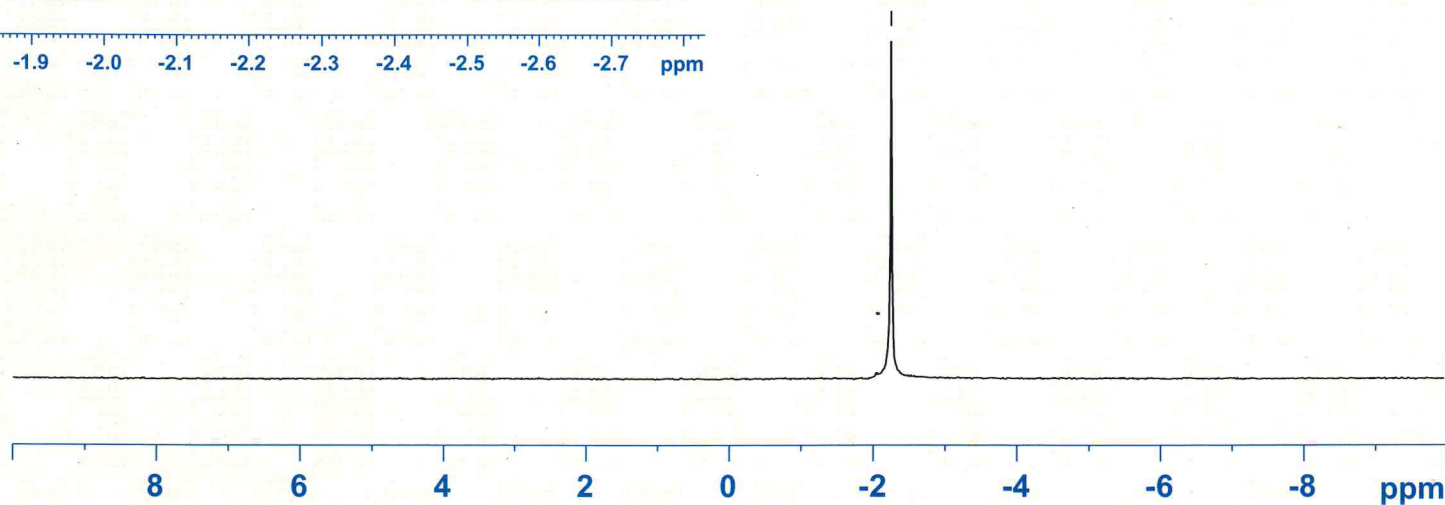

8 6 4 2 0 -2 -4 -6 -8 ppm



1,1'-dilithiobiolumbole 1H in tol-d8 at. 223K (cal@2.1)

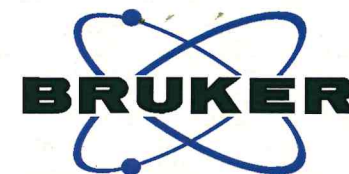

NAME SAIMN-DilithiobiVTH  
 EXPNO 1  
 PROCNO 1  
 Date\_ 20141104  
 Time 13.32  
 INSTRUM spect  
 PROBHD 5 mm PABBO BB-  
 PULPROG zg30  
 TD 65536  
 SOLVENT Tol  
 NS 8  
 DS 2  
 SWH 10330.578 Hz  
 FIDRES 0.157632 Hz  
 AQ 3.1719923 sec  
 RG 101  
 DW 48.400 usec  
 DE 6.50 usec  
 TE 222.9 K  
 D1 1.00000000 sec  
 TDO 1

----- CHANNEL f1 -----  
 NUC1 1H  
 P1 11.80 usec  
 PL1 2.40 dB  
 PL1W 15.17711735 W  
 SFO1 500.0330885 MHz  
 SI 32768  
 SF 500.0300145 MHz  
 WDW EM  
 SSB 0  
 LB 0.30 Hz  
 GB 0  
 PC 1.00

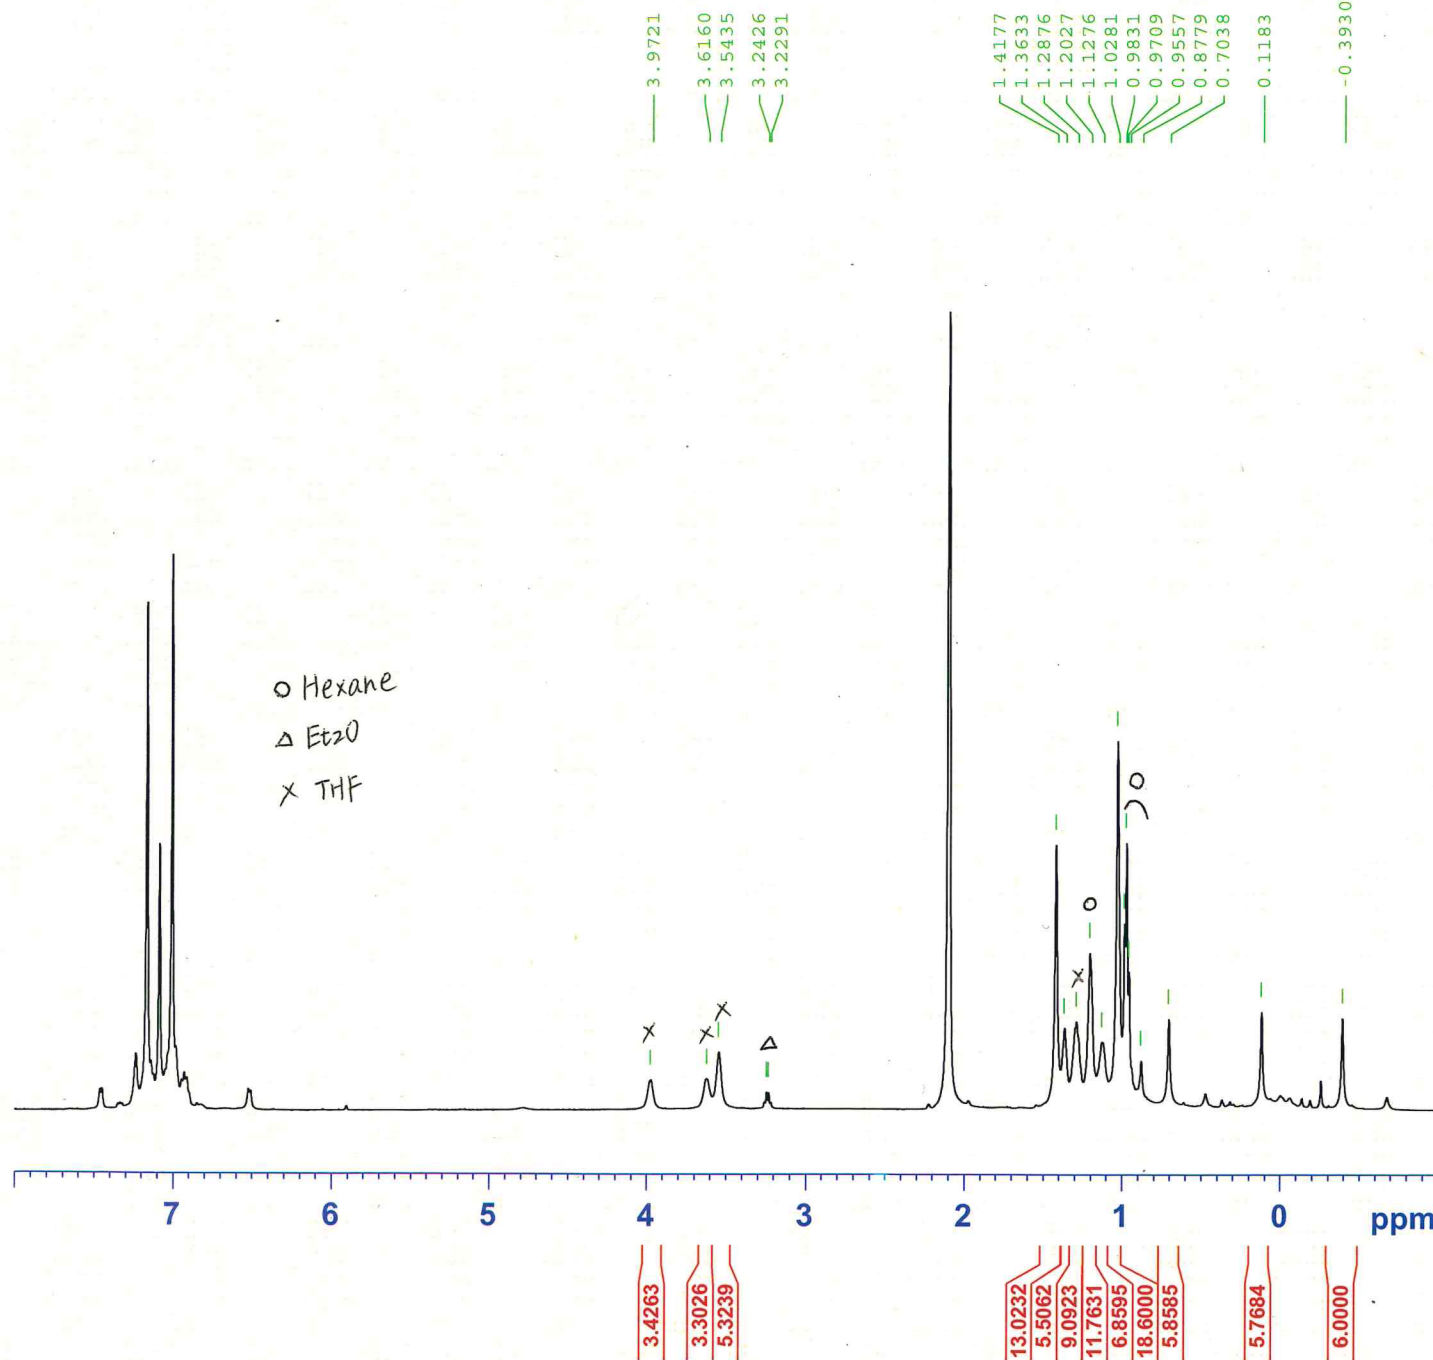

1,1'-dilithiobiolumbole 13C in tol-d8 at.223K (cal@21.0)

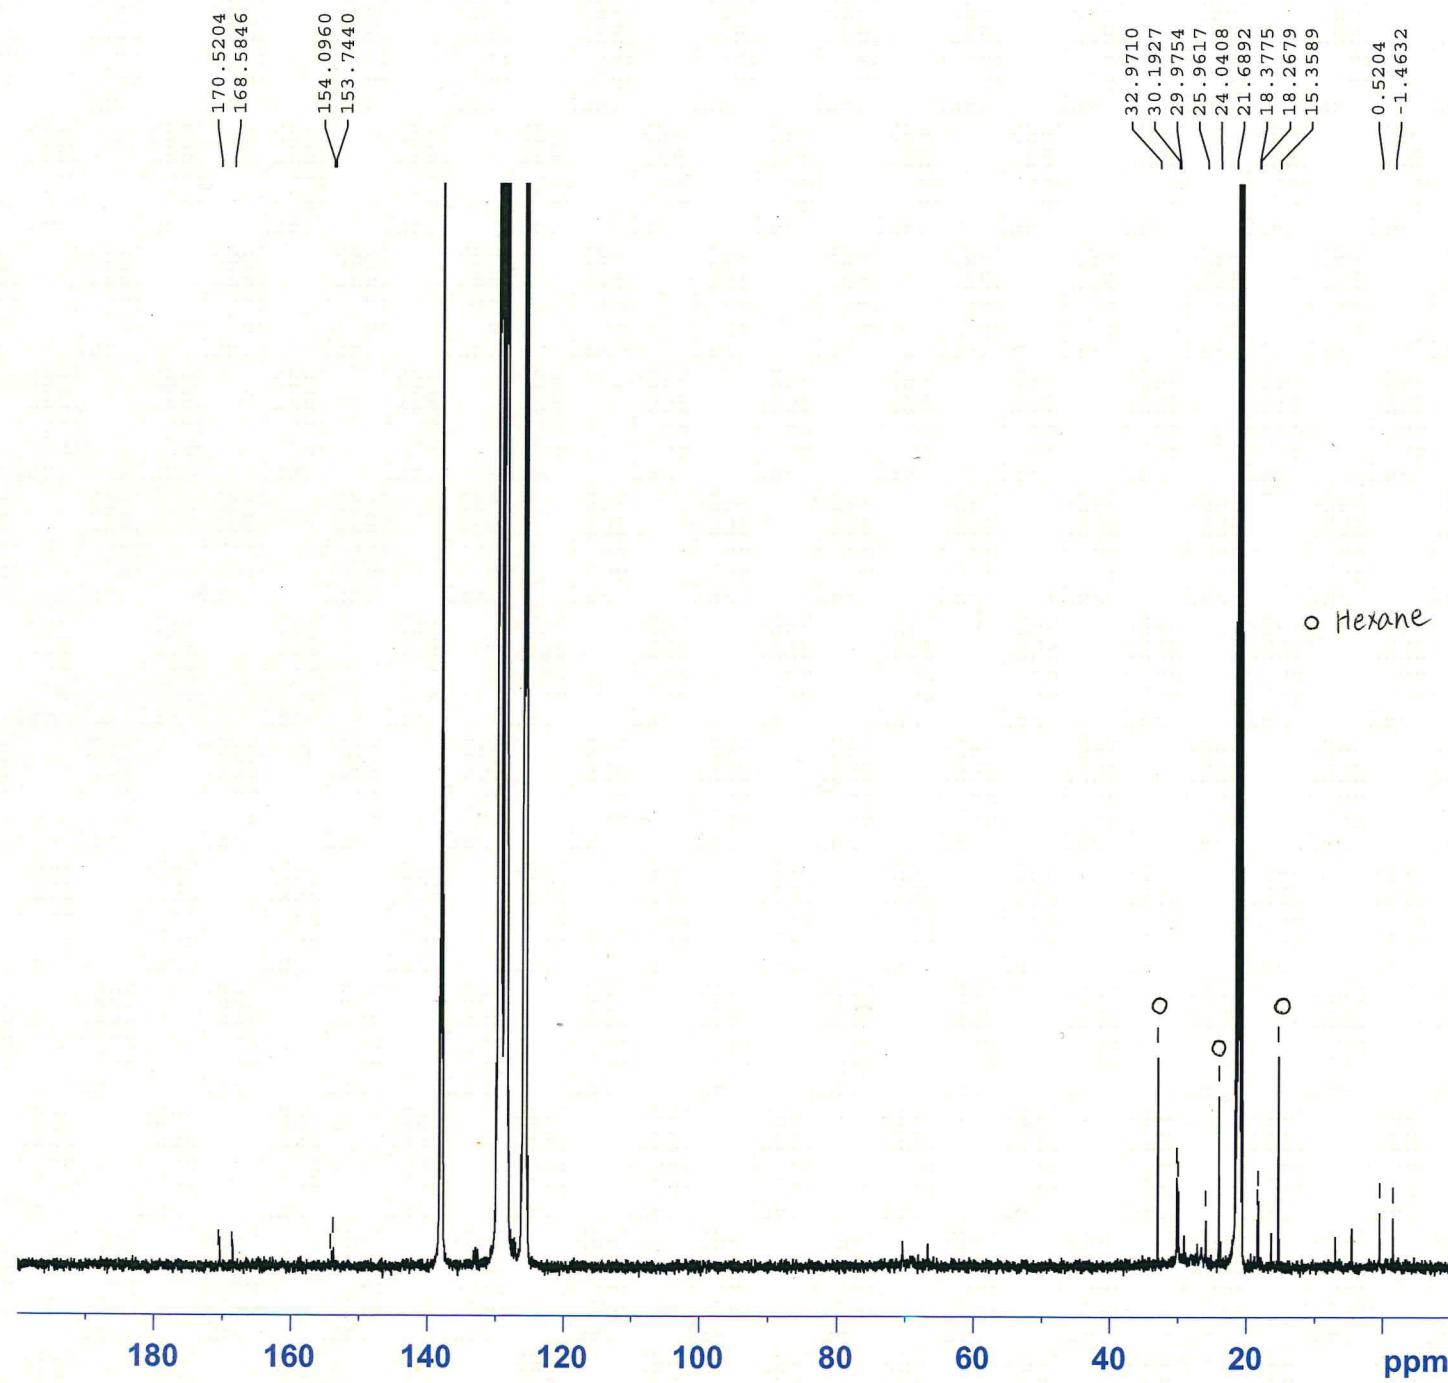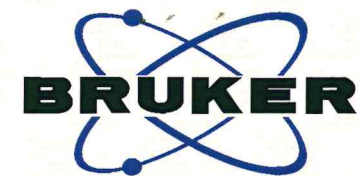

NAME SAIMN-DilithiobiVTC  
 EXPNO 1  
 PROCNO 1  
 Date 20141104  
 Time 13.35  
 INSTRUM spect  
 PROBHD 5 mm PABBO BB-  
 PULPROG zgpg30  
 TD 65536  
 SOLVENT Tol  
 NS 3891  
 DS 2  
 SWH 40760.871 Hz  
 FIDRES 0.621962 Hz  
 AQ 0.8039582 sec  
 RG 203  
 DW 12.267 usec  
 DE 6.50 usec  
 TE 223.0 K  
 D1 2.00000000 sec  
 D11 0.03000000 sec  
 TD0 1

===== CHANNEL f1 =====  
 NUC1 13C  
 P1 9.80 usec  
 PL1 0.00 dB  
 PL1W 100.47545624 W  
 SFO1 125.7477319 MHz

===== CHANNEL f2 =====  
 CPDPRG2 waltz16  
 NUC2 1H  
 PCPD2 80.00 usec  
 PL2 2.40 dB  
 PL12 19.02 dB  
 PL13 22.02 dB  
 PL2W 15.17711735 W  
 PL12W 0.33051354 W  
 PL13W 0.16564916 W  
 SFO2 500.0316016 MHz  
 SI 16384  
 SF 125.7325542 MHz  
 WDW EM  
 SSB 0  
 LB 1.00 Hz  
 GB 0  
 PC 1.40

Ex 225 1H in THF

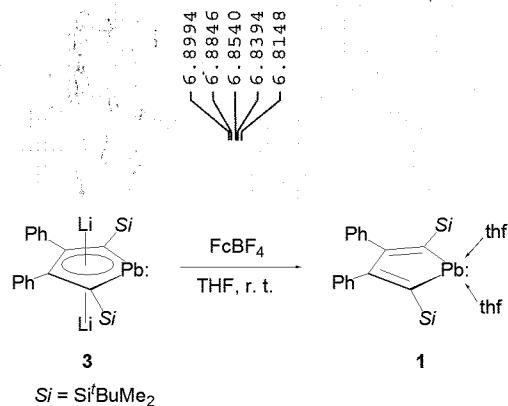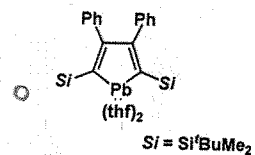

6.8994  
6.8846  
6.8540  
6.8394  
6.8148

4.1268

0.9231

-0.3847

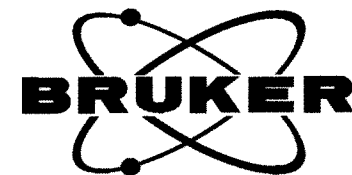

NAME A13MC116EF  
 EXPNO 1  
 PROCNO 1  
 Date\_ 20130912  
 Time 11.47  
 INSTRUM spect  
 PROBHD 5 mm PABBO BB-  
 PULPROG zg30  
 TD 65536  
 SOLVENT C6D6  
 NS 8  
 DS 2  
 SWH 10330.578 Hz  
 FIDRES 0.157632 Hz  
 AQ 3.1719923 sec  
 RG 3.2  
 DW 48.400 usec  
 DE 6.50 usec  
 TE 300.4 K  
 D1 1.00000000 sec  
 TD0 1

===== CHANNEL f1 =====  
 NUC1 1H  
 P1 11.80 usec  
 PL1 2.40 dB  
 PL1W 15.17711735 W  
 SFO1 500.0330885 MHz  
 SI 32768  
 SF 500.0301467 MHz  
 WDW EM  
 SSB 0  
 LB 0.30 Hz  
 GB 0  
 PC 1.00

Ferrocene

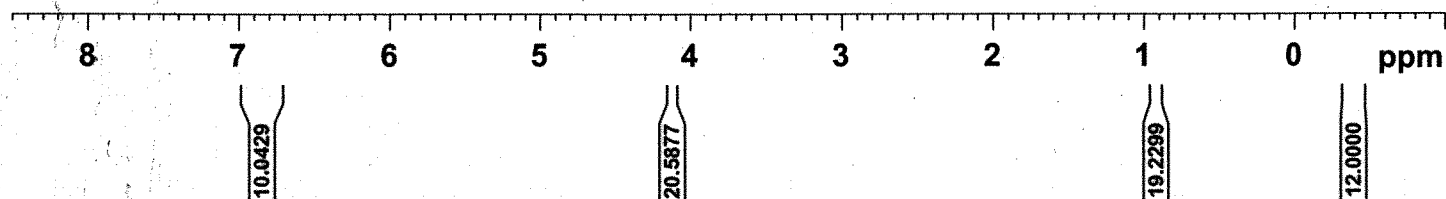

Ex 226 13C in THF

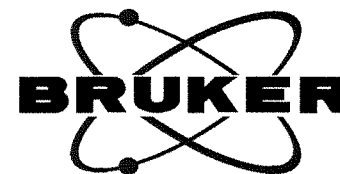

NAME A12MC108of  
 EXPNO 1  
 PROCNO 1  
 Date\_ 20130912  
 Time 12.20  
 INSTRUM spect  
 PROBHD 5 mm CPQNP 1H/  
 PULPROG zgpg30  
 TD 65536  
 SOLVENT C6D6  
 NS 72  
 DS 2  
 SWH 29761.904 Hz  
 FIDRES 0.454131 Hz  
 AQ 1.1010548 sec  
 RG 126.99  
 DW 16.800 usec  
 DE 18.00 usec  
 TE 300.0 K  
 D1 2.00000000 sec  
 D11 0.03000000 sec  
 TD0 1

===== CHANNEL f1 =====  
 NUC1 13C  
 P1 12.00 usec  
 SI 32768  
 SF 100.6127374 MHz  
 WDW EM  
 SSB 0  
 LB 2.00 Hz  
 GB 0  
 PC 1.40

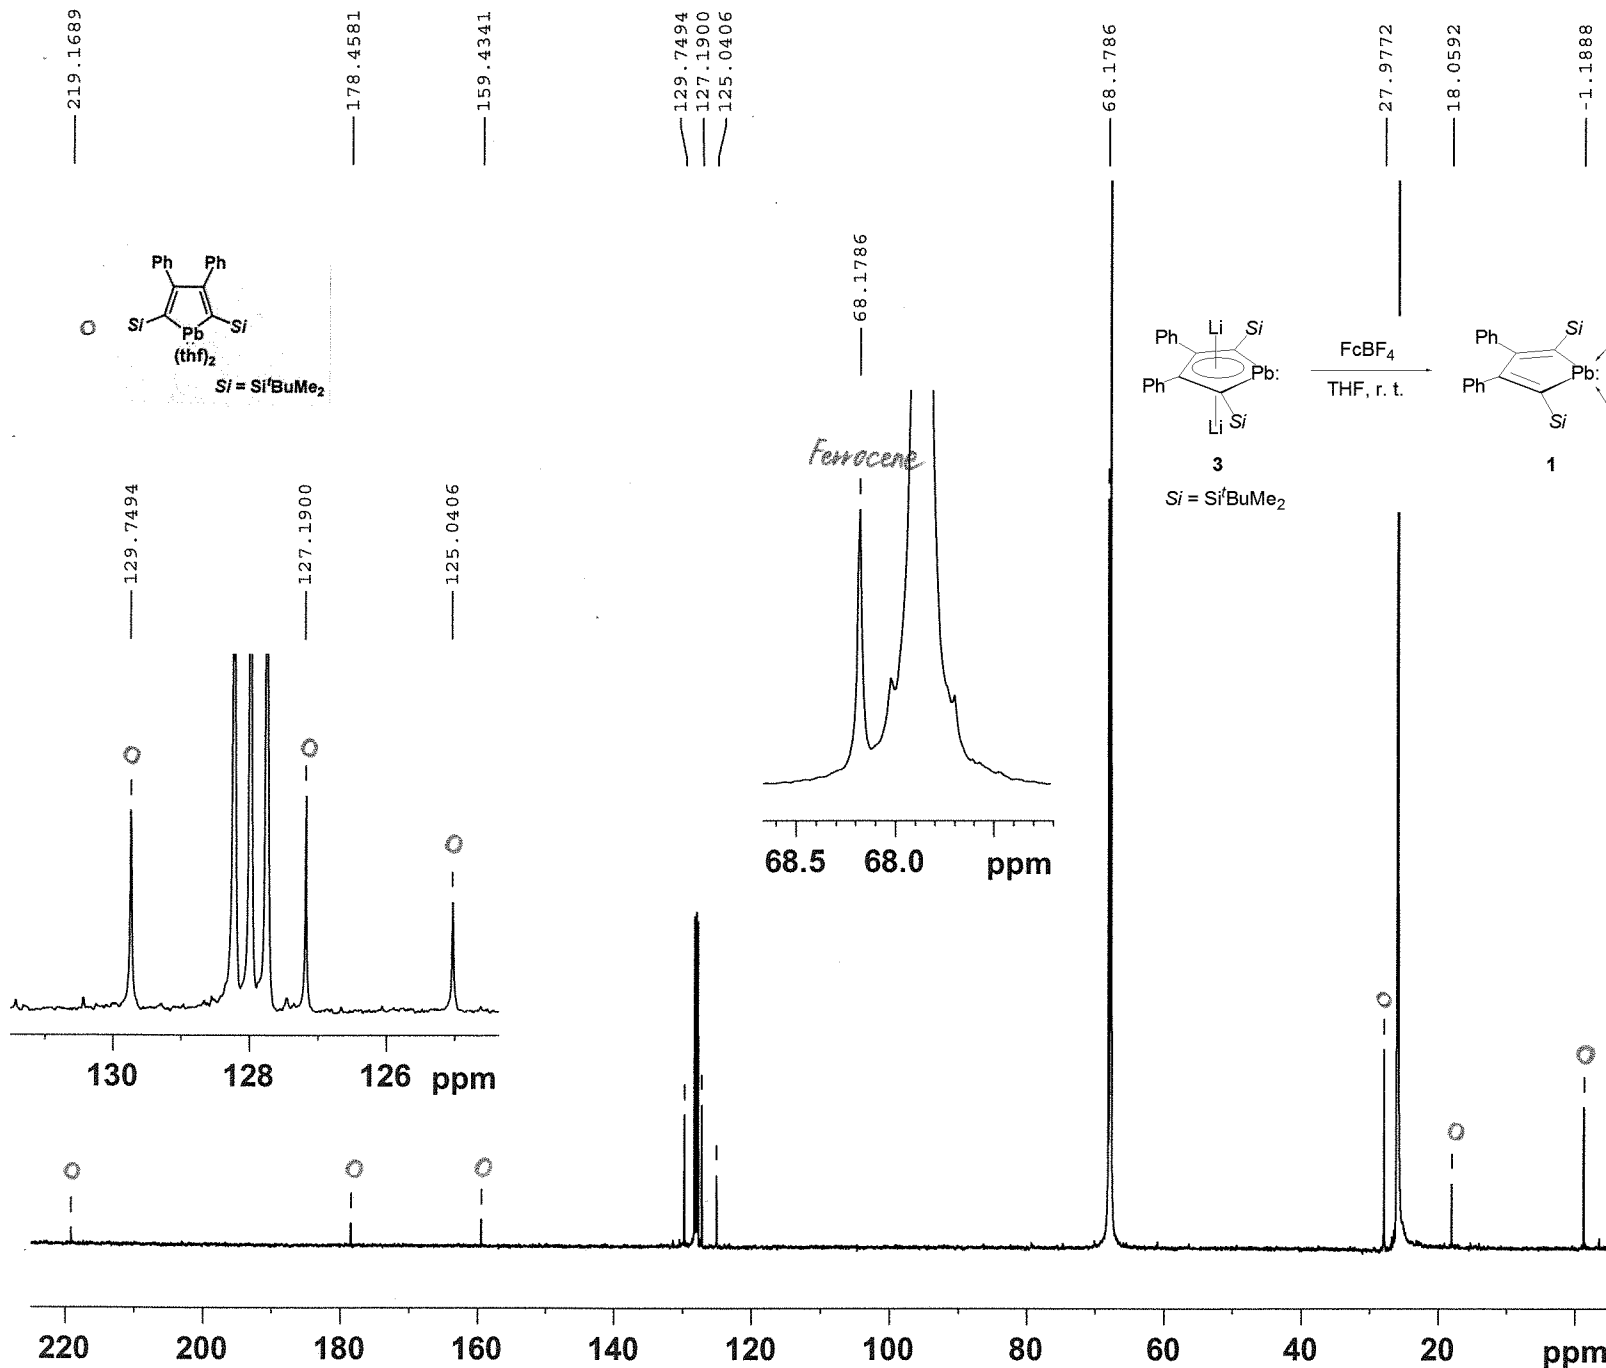

Ex 376 1H in C6D6 and THF

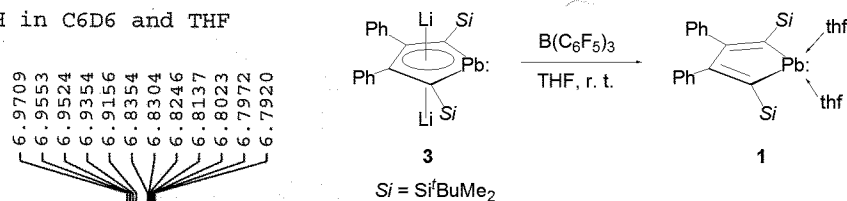

— 1.0213

— -0.1926

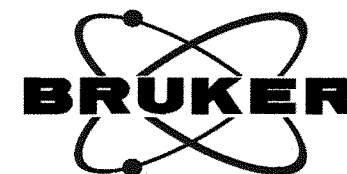

Current Data Parameters  
 NAME A13MC116H  
 EXPNO 376  
 PROCNO 1

F2 - Acquisition Parameters  
 Date\_ 20140611  
 Time\_ 12.08  
 INSTRUM spect  
 PROBHD 5 mm CPQNP 1H/  
 PULPROG zg30  
 TD 65536  
 SOLVENT C6D6  
 NS 4  
 DS 2  
 SWH 8305.647 Hz  
 FIDRES 0.126734 Hz  
 AQ 3.9453173 sec  
 RG 4.17  
 DW 60.200 usec  
 DE 10.00 usec  
 TE 300.0 K  
 D1 1.00000000 sec  
 TD0 1

===== CHANNEL f1 =====  
 NUC1 1H  
 P1 15.00 usec  
 PLW1 5.19999981 W  
 SFO1 400.1324708 MHz

F2 - Processing parameters  
 SI 32768  
 SF 400.1300006 MHz  
 WDW EM  
 SSB 0  
 LB 0.30 Hz  
 GB 0  
 PC 1.00

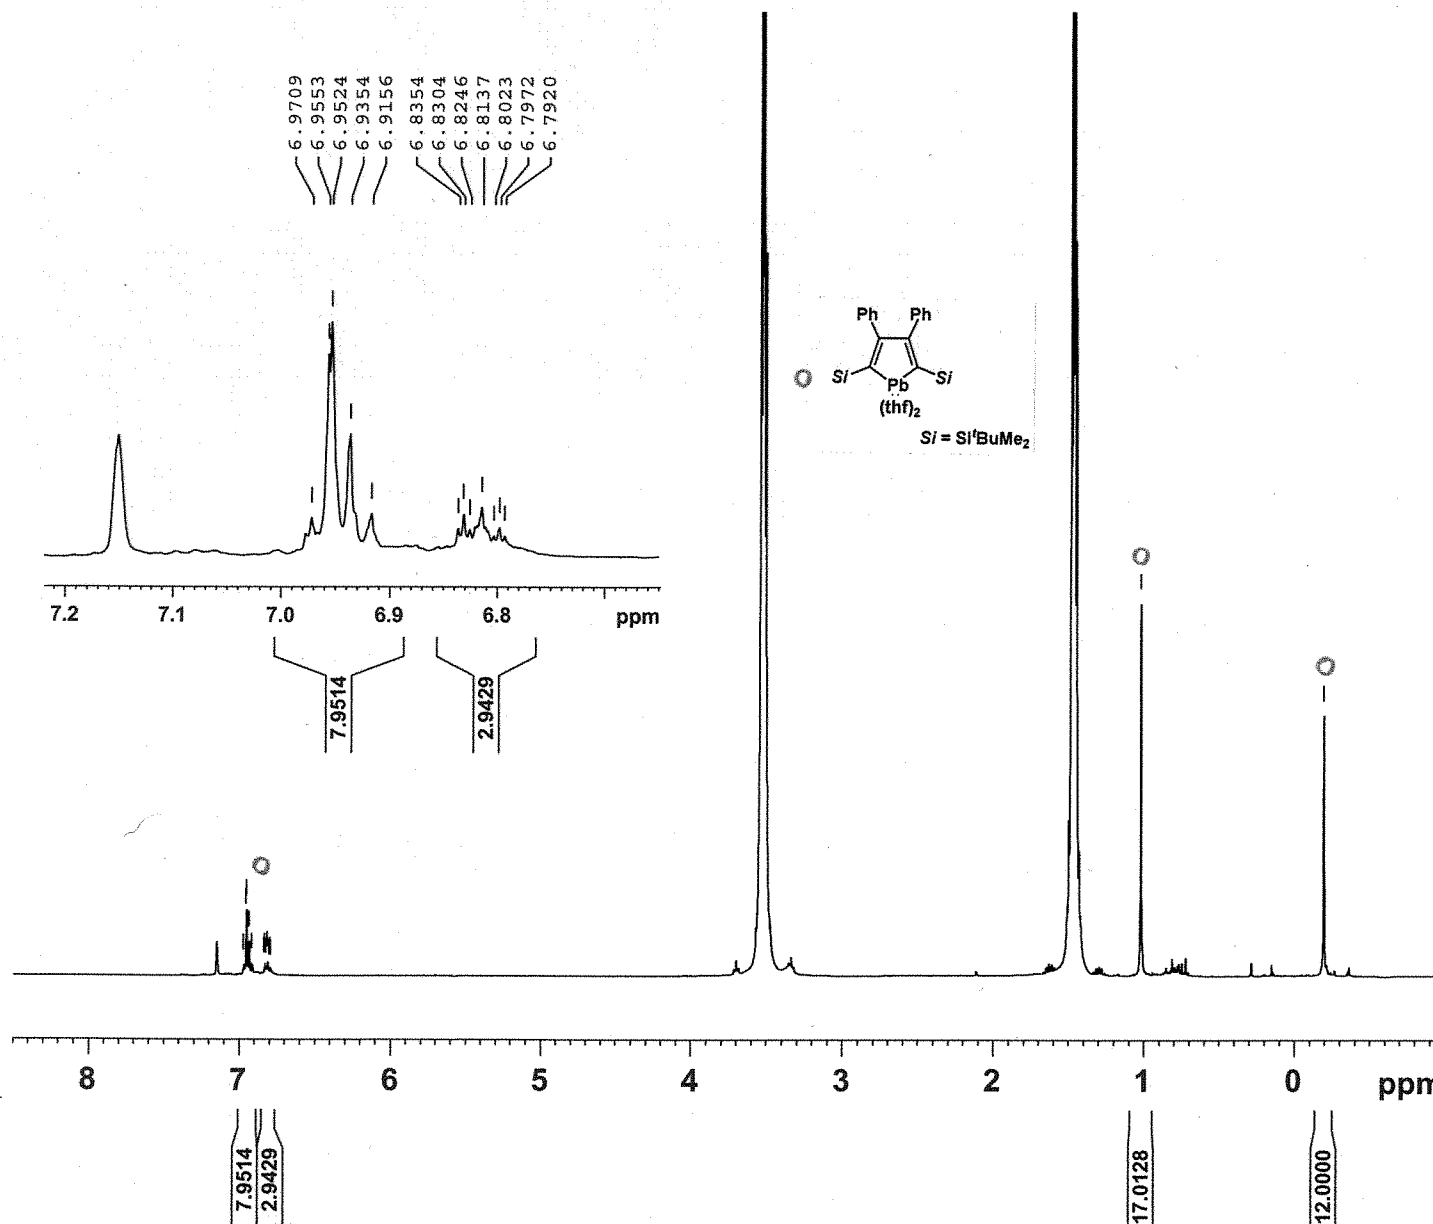

Ex 376 <sup>13</sup>C in C<sub>6</sub>D<sub>6</sub> and THF

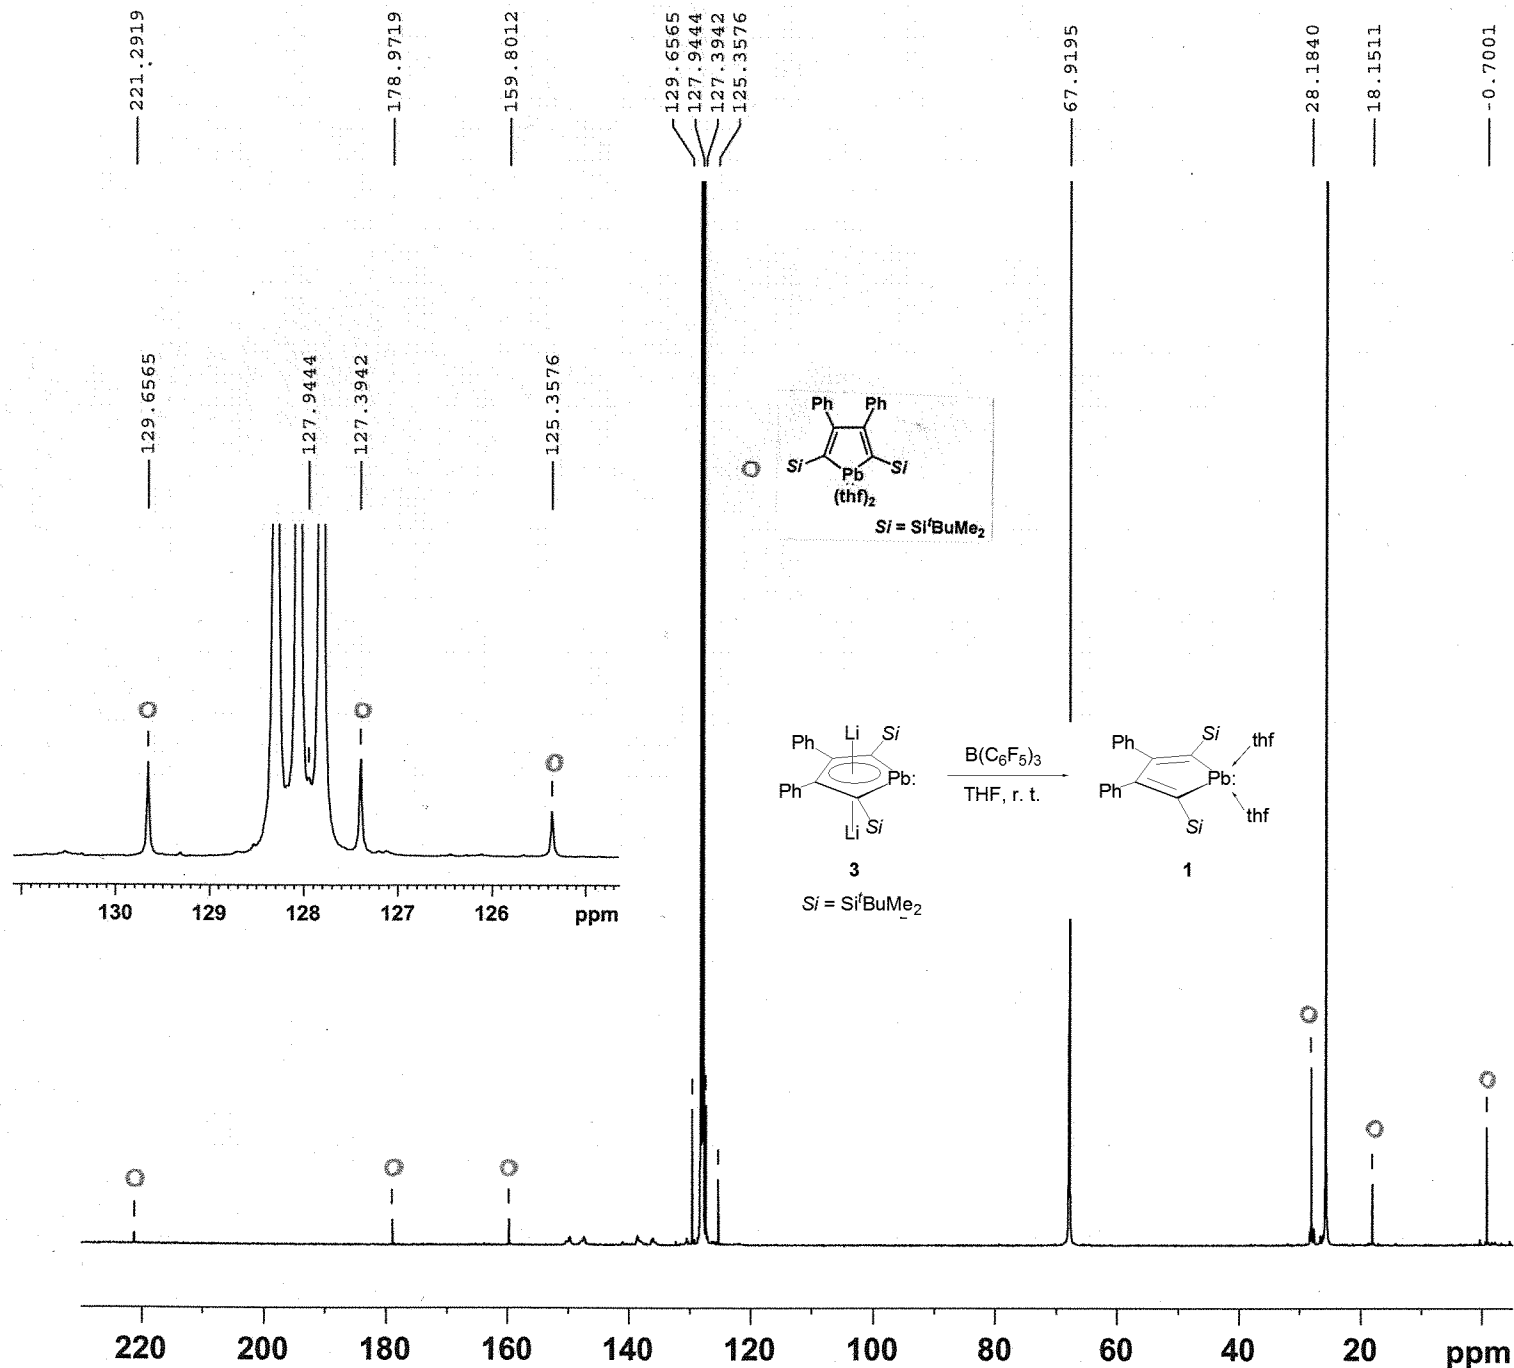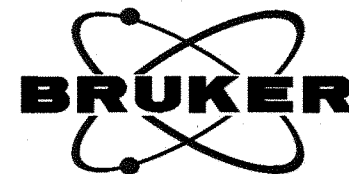

Current Data Parameters  
 NAME A13MC116C  
 EXPNO 376  
 PROCNO 1

F2 - Acquisition Parameters  
 Date\_ 20140611  
 Time 20.47  
 INSTRUM spect  
 PROBHD 5 mm CPQNP 1H/  
 PULPROG zgpg30  
 TD 65536  
 SOLVENT C<sub>6</sub>D<sub>6</sub>  
 NS 560  
 DS 2  
 SWH 29761.904 Hz  
 FIDRES 0.454131 Hz  
 AQ 1.1010548 sec  
 RG 126.99  
 DW 16.800 usec  
 DE 18.00 usec  
 TE 300.0 K  
 D1 2.00000000 sec  
 D11 0.03000000 sec  
 TD0 1

===== CHANNEL f1 =====  
 NUC1 <sup>13</sup>C  
 P1 12.00 usec  
 PLW1 15.50000000 W  
 SFO1 100.6248425 MHz

===== CHANNEL f2 =====  
 CPDPRG2 waltz16  
 NUC2 <sup>1</sup>H  
 PCPD2 90.00 usec  
 PLW2 5.19999981 W  
 PLW12 0.14444000 W  
 PLW13 0.11700000 W  
 SFO2 400.1316005 MHz

F2 - Processing parameters  
 SI 32768  
 SF 100.6127216 MHz  
 WDW EM  
 SSB 0  
 LB 2.00 Hz  
 GB 0  
 PC 1.40

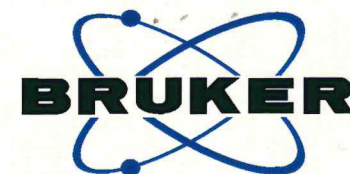

NAME A13MC116H  
 EXPNO 382  
 PROCNO 1  
 Date\_ 20140619  
 Time 14.49  
 INSTRUM spect  
 PROBHD 5 mm PABBO BB-  
 PULPROG zg30  
 TD 65536  
 SOLVENT C6D6  
 NS 8  
 DS 2  
 SWH 10330.578 Hz  
 FIDRES 0.157632 Hz  
 AQ 3.1719923 sec  
 RG 4  
 DW 48.400 usec  
 DE 6.50 usec  
 TE 300.6 K  
 D1 1.00000000 sec  
 TD0 1

===== CHANNEL f1 =====  
 NUC1 1H  
 P1 11.80 usec  
 PL1 2.40 dB  
 PL1W 15.17711735 W  
 SFO1 500.0330885 MHz  
 SI 32768  
 SF 500.0300272 MHz  
 WDW EM  
 SSB 0  
 LB 0.30 Hz  
 GB 0  
 PC 1.00

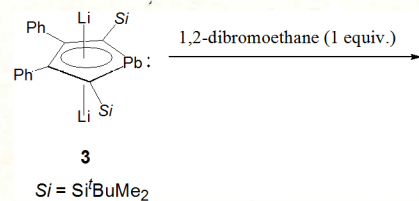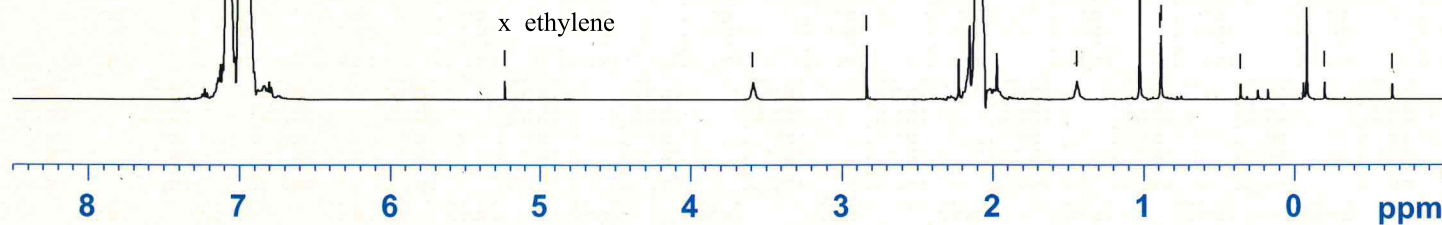

1.3207

19.5566

12.0000



Ex 382 13C inTol cal@21.1

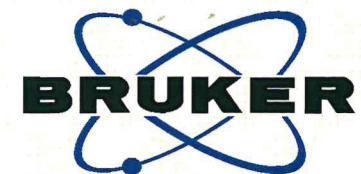

Current Data Parameters  
 NAME A13MC116H  
 EXPNO 3822  
 PROCNO 1

F2 - Acquisition Parameters  
 Date\_ 20140619  
 Time 15.09  
 INSTRUM spect  
 PROBHD 5 mm CPQNP 1H/  
 PULPROG zgpg30  
 TD 65536  
 SOLVENT C6D6  
 NS 400  
 DS 2  
 SWH 29761.904 Hz  
 FIDRES 0.454131 Hz  
 AQ 1.1010548 sec  
 RG 126.99  
 DW 16.800 usec  
 DE 18.00 usec  
 TE 300.0 K  
 D1 2.00000000 sec  
 D11 0.03000000 sec  
 TD0 1

===== CHANNEL f1 =====  
 NUC1 13C  
 P1 12.00 usec  
 PLW1 15.50000000 W  
 SFO1 100.6248425 MHz

===== CHANNEL f2 =====  
 CPDPRG2 waltz16  
 NUC2 1H  
 PCPD2 90.00 usec  
 PLW2 5.19999981 W  
 PLW12 0.14444000 W  
 PLW13 0.11700000 W  
 SFO2 400.1316005 MHz

F2 - Processing parameters  
 SI 32768  
 SF 100.6127592 MHz  
 WDW EM  
 SSB 0  
 LB 2.00 Hz  
 GB 0  
 PC 1.40

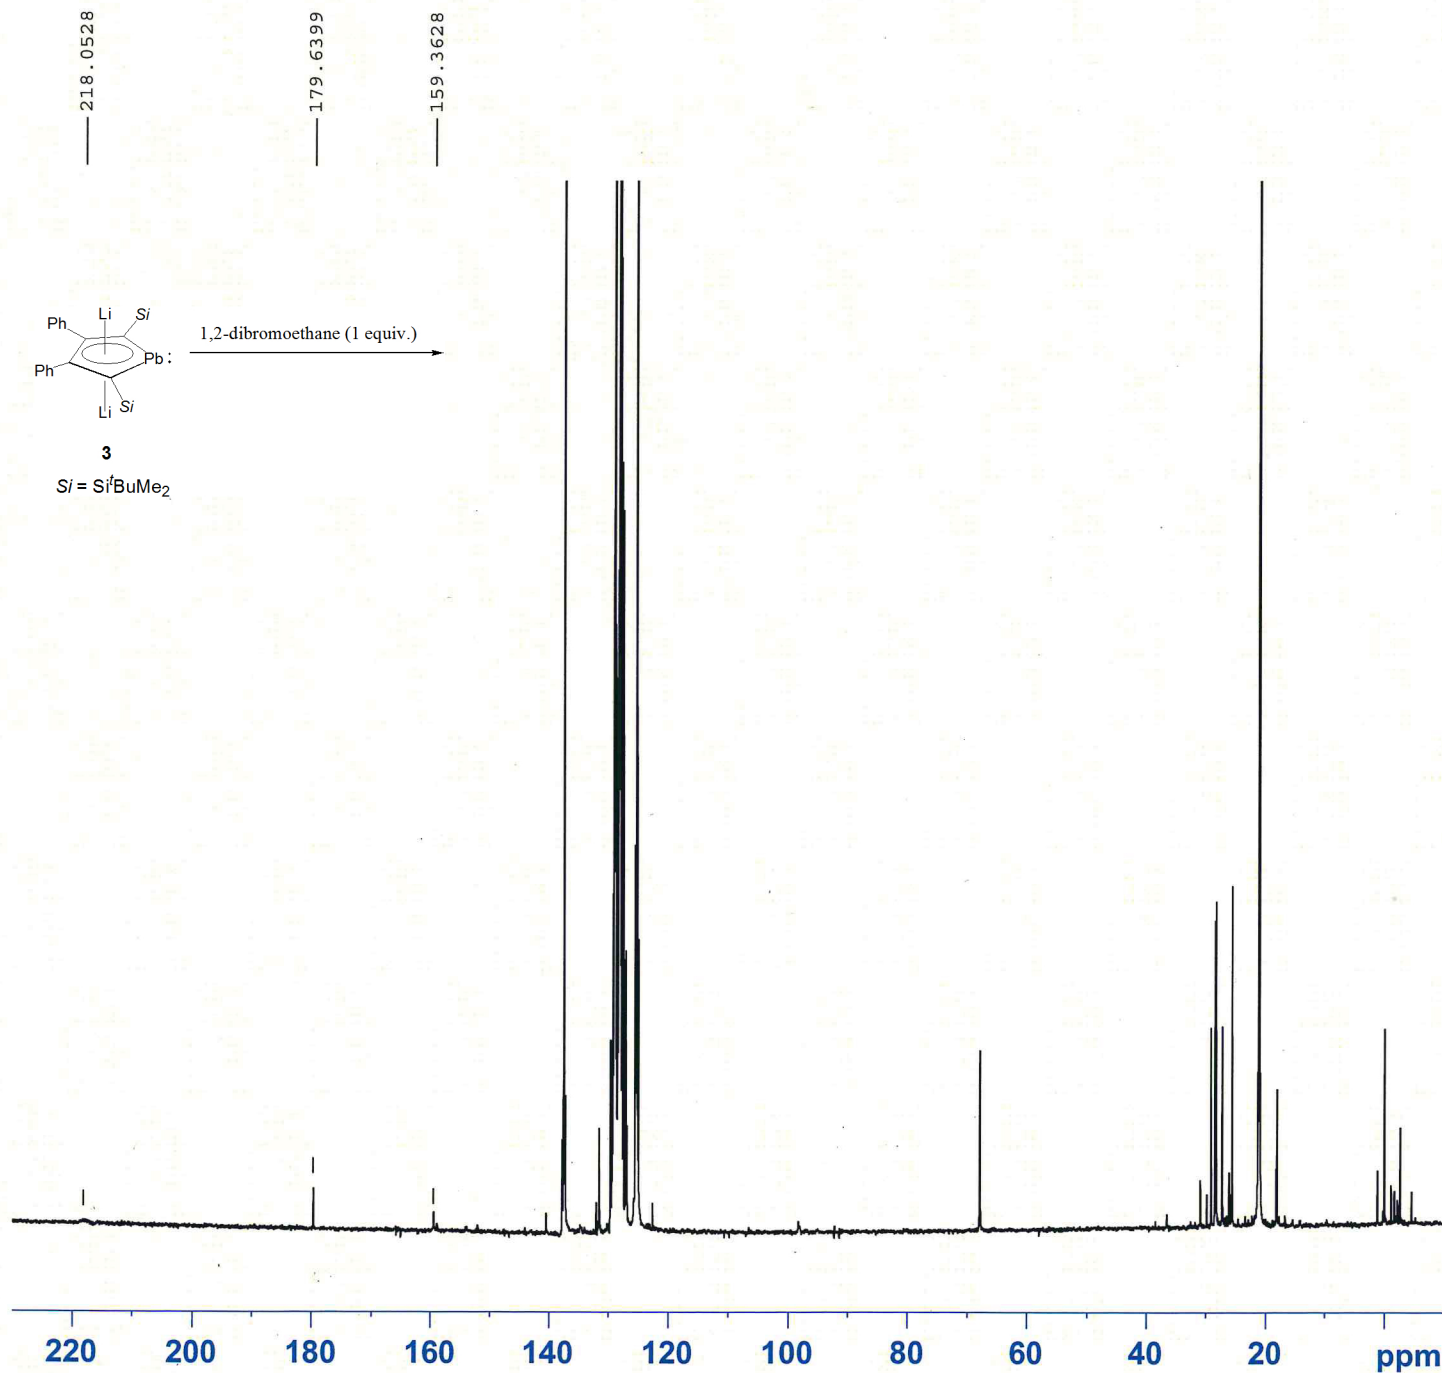



TBDMS Ph plumbacyclo~ (cal @ 2.1) in tol-d8

6.9976  
6.9860  
6.9824  
6.9758  
6.9704  
6.9575  
6.9378  
6.8458  
6.8416  
6.8371  
6.8292  
6.8268  
6.8240  
6.8213  
6.8187  
6.8106  
6.8066  
6.8023

3.6863  
3.6847  
3.6800  
3.6760  
3.6697  
3.6636  
3.6595  
3.6532

1.4818  
1.4741  
1.4653  
1.4602  
1.4566  
1.4488  
1.0311

— 0.1199

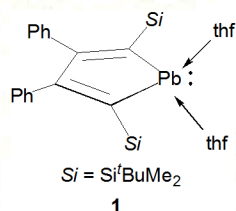

7.1056  
7.0240  
7.0066  
7.0024  
6.9976  
6.9860  
6.9824  
6.9758  
6.9704  
6.9575  
6.9378  
6.8458  
6.8416  
6.8371  
6.8292  
6.8268  
6.8240  
6.8213  
6.8187  
6.8106

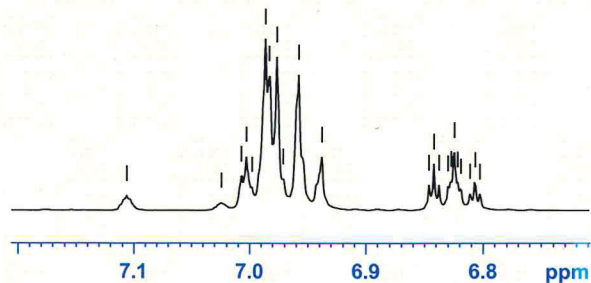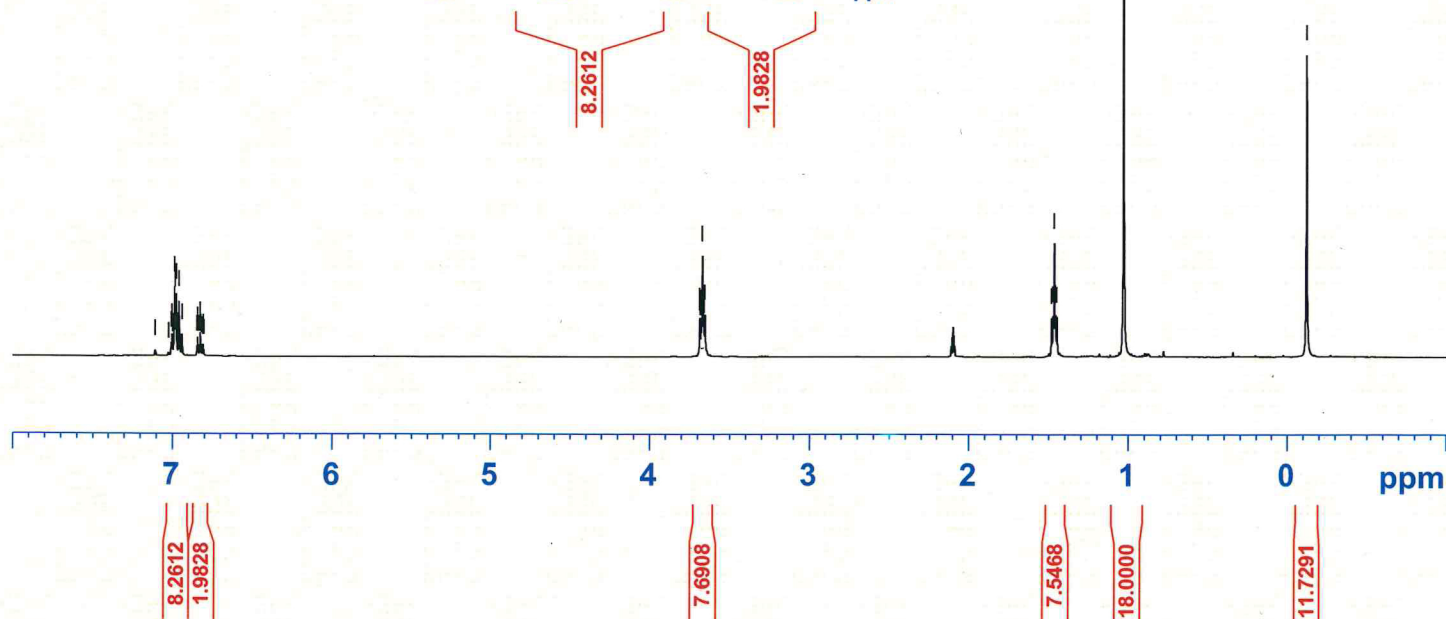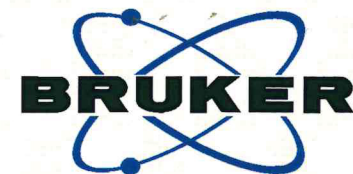

Current Data Parameters  
NAME A13MC116H  
EXPNO 1  
PROCNO 1

F2 - Acquisition Parameters  
Date 20150108  
Time 18.29  
INSTRUM spect  
PROBHD 5 mm CPQNP 1H/  
PULPROG zg30  
TD 65536  
SOLVENT Tol  
NS 4  
DS 2  
SWH 8305.647 Hz  
FIDRES 0.126734 Hz  
AQ 3.9453173 sec  
RG 4.71  
DW 60.200 usec  
DE 10.00 usec  
TE 300.0 K  
D1 1.00000000 sec  
TD0 1

===== CHANNEL f1 =====  
NUC1 1H  
P1 15.00 usec  
PLW1 5.19999981 W  
SFO1 400.1324708 MHz

F2 - Processing parameters  
SI 32768  
SF 400.1300105 MHz  
WDW EM  
SSB 0  
LB 0.30 Hz  
GB 0  
PC 1.00

TBDMS Ph plumbacyclo~ (cal@21.1) in tol-d8

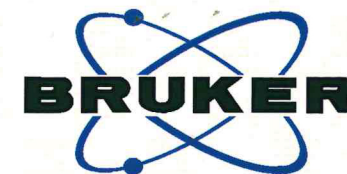

Current Data Parameters  
 NAME A13MC116C  
 EXPNO 1  
 PROCNO 1

F2 - Acquisition Parameters  
 Date\_ 20150108  
 Time 18.32  
 INSTRUM spect  
 PROBHD 5 mm CPQNP 1H/  
 PULPROG zgpg30  
 TD 65536  
 SOLVENT Tol  
 NS 112  
 DS 2  
 SWH 29761.904 Hz  
 FIDRES 0.454131 Hz  
 AQ 1.1010548 sec  
 RG 126.99  
 DW 16.800 usec  
 DE 18.00 usec  
 TE 300.0 K  
 D1 2.00000000 sec  
 D11 0.03000000 sec  
 TD0 1

===== CHANNEL f1 =====  
 NUC1 13C  
 P1 12.00 usec  
 PLW1 15.50000000 W  
 SFO1 100.6248425 MHz

===== CHANNEL f2 =====  
 CPDPRG2 waltz16  
 NUC2 1H  
 PCPD2 90.00 usec  
 PLW2 5.19999981 W  
 PLW12 0.14444000 W  
 PLW13 0.11700000 W  
 SFO2 400.1316005 MHz

F2 - Processing parameters  
 SI 32768  
 SF 100.6126618 MHz  
 WDW EM  
 SSB 0  
 LB 2.00 Hz  
 GB 0  
 PC 1.40

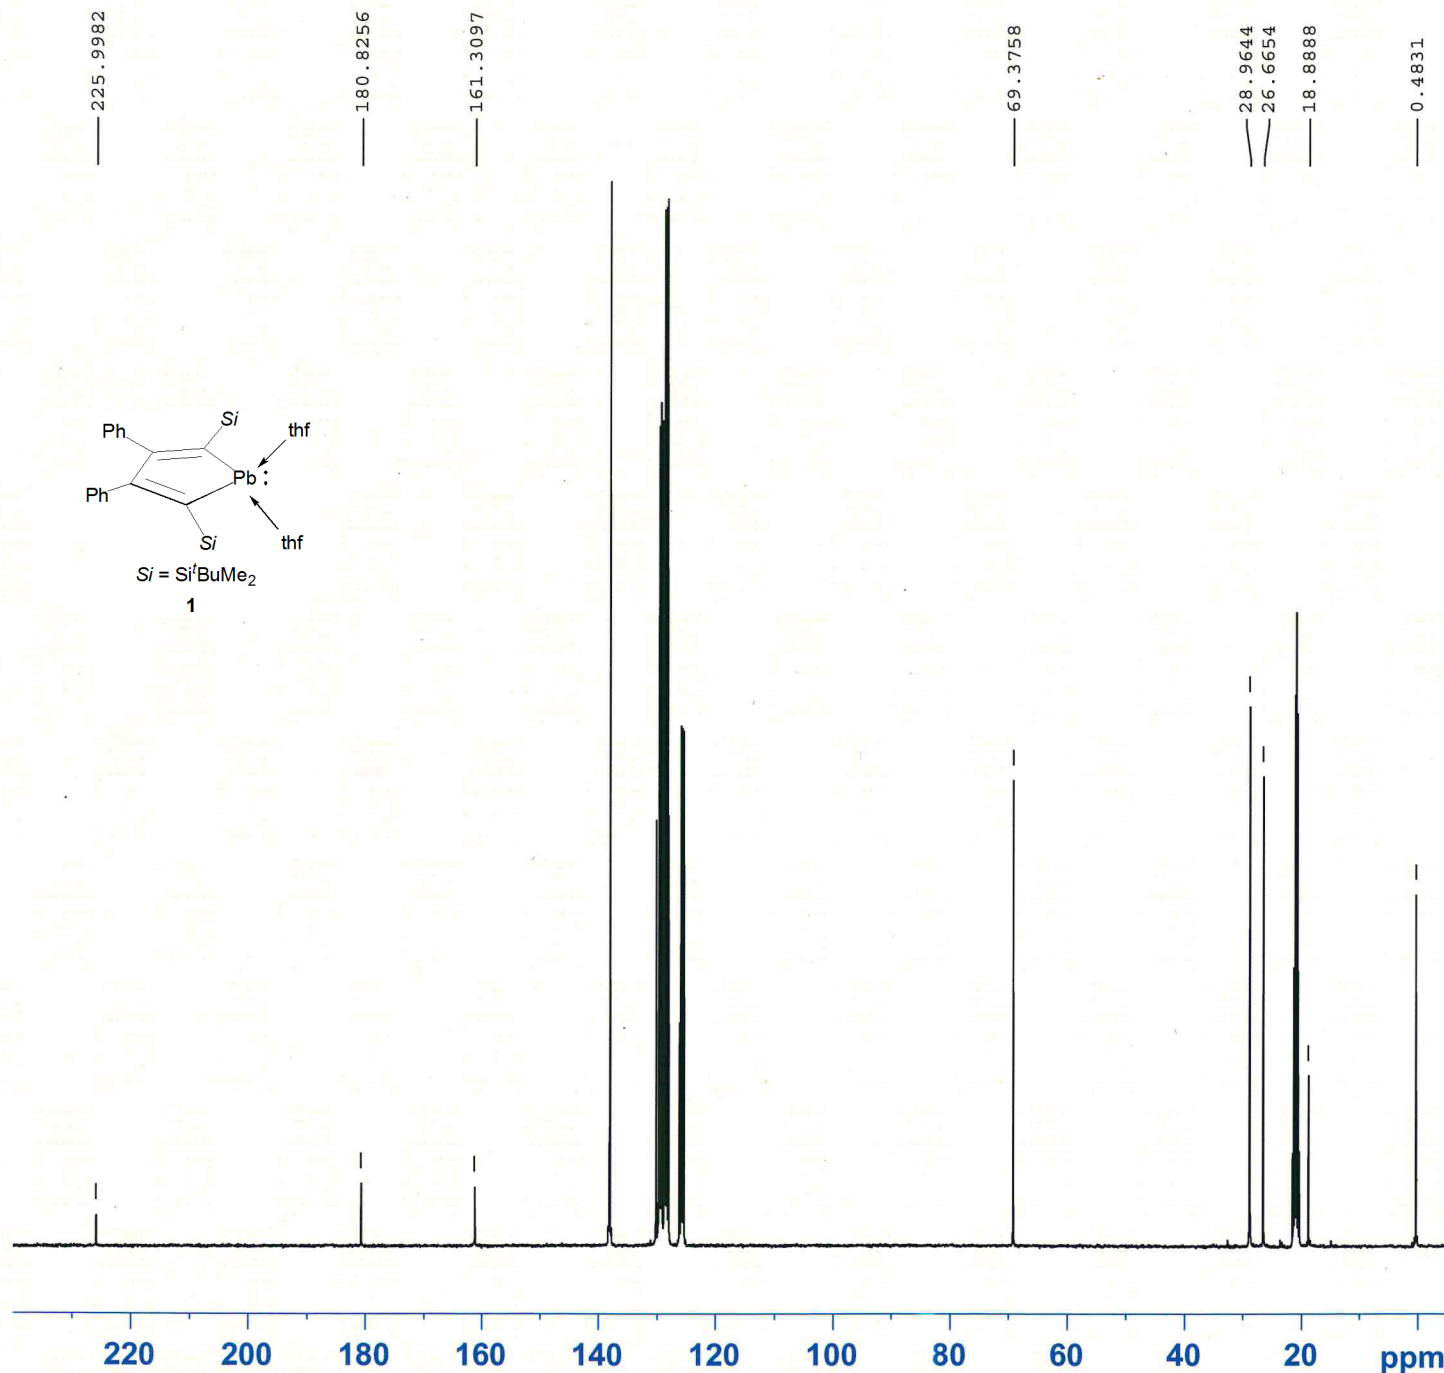

Supplement: c4cc09856k1.pdf [file c4cc09856k1.pdf]
